# Supplementary material for: Changes in Statin Adherence Following an Acute Myocardial Infarction Among Older Adults: Patient Predictors and the Association With Follow‐Up With Primary Care Providers and/or Cardiologists
Source: PubMed Central journal article supplement — J Am Heart Assoc. 2017 Oct 19;6(10):e007106. doi: 10.1161/JAHA.117.007106 (PMC5721894; doi:10.1161/jaha.117.007106), 2017-10-19
Supplement: JAH3-6-e007106-s001.pdf [file JAH3-6-e007106-s001.pdf]

# **Supplemental Material**

**Table S1.** Patient characteristics stratified by change in statin adherence after AMI.

| Patient Characteristics             | Total<br>N=113,296<br>N (%) | Adherence Change                |                                  |                                 |
|-------------------------------------|-----------------------------|---------------------------------|----------------------------------|---------------------------------|
|                                     |                             | Decrease<br>N=18,502<br>% [ASD] | No Change<br>N=72,510<br>% [ASD] | Increase<br>N=22,284<br>% [ASD] |
| <b>Age</b>                          |                             |                                 |                                  |                                 |
| Mean $\pm$ SD                       | 77.3 $\pm$ 7.4              | 77.7 $\pm$ 7.4 [4.5]            | 77.4 $\pm$ 7.4 [Ref]             | 76.5 $\pm$ 7.1 [11.9]           |
| 66-75                               | 51,010 (45.0)               | 42.6 [3.4]                      | 44.3 [Ref]                       | 49.3 [10.0]                     |
| 76-85                               | 44,751 (39.5)               | 40.2 [0.9]                      | 39.7 [Ref]                       | 38.2 [3.1]                      |
| 86+                                 | 17,535 (15.5)               | 17.2 [3.3]                      | 16.0 [Ref]                       | 12.5 [9.9]                      |
| Female                              | 61,555 (54.3)               | 55.1 [2.7]                      | 53.7 [Ref]                       | 55.7 [3.9]                      |
| <b>Race/ethnicity</b>               |                             |                                 |                                  |                                 |
| White                               | 95,481 (84.3)               | 83.8 [4.7]                      | 85.5 [Ref]                       | 80.5 [13.5]                     |
| Black                               | 9,700 (8.6)                 | 9.0 [4.5]                       | 7.7 [Ref]                        | 10.9 [10.9]                     |
| Hispanic                            | 3,413 (3.0)                 | 3.2 [3.2]                       | 2.6 [Ref]                        | 4.0 [7.8]                       |
| Asian                               | 2,504 (2.2)                 | 1.9 [2.2]                       | 2.2 [Ref]                        | 2.5 [1.6]                       |
| Other                               | 2,198 (1.9)                 | 2.1 [1.7]                       | 1.9 [Ref]                        | 2.1 [1.8]                       |
| Dual eligibility*                   | 28,462 (25.1)               | 23.6 [3.0]                      | 24.9 [Ref]                       | 27.1 [5.1]                      |
| <b>Household income<sup>†</sup></b> |                             |                                 |                                  |                                 |
| $\leq$ \$30,000                     | 53,388 (47.1)               | 47.7 [2.2]                      | 46.6 [Ref]                       | 48.5 [3.8]                      |
| \$30,001-60,000                     | 46,749 (41.3)               | 40.8 [1.8]                      | 41.7 [Ref]                       | 40.1 [3.3]                      |
| \$60,001-100,000                    | 10,579 (9.3)                | 9.2 [0.7]                       | 9.4 [Ref]                        | 9.2 [0.5]                       |
| \$100,001-150,000                   | 1,963 (1.7)                 | 1.8 [0.4]                       | 1.7 [Ref]                        | 1.6 [0.9]                       |
| >\$150,000                          | 617 (0.5)                   | 0.5 [1.4]                       | 0.6 [Ref]                        | 0.5 [0.3]                       |
| <b>CCI comorbidities</b>            |                             |                                 |                                  |                                 |
| AMI                                 | 5,228 (4.6)                 | 5.4 [3.5]                       | 4.6 [Ref]                        | 4.0 [3.0]                       |
| Cancer                              | 13,792 (12.2)               | 13.3 [3.5]                      | 12.1 [Ref]                       | 11.4 [2.2]                      |
| CeVD                                | 20,900 (18.4)               | 20.1 [4.6]                      | 18.3 [Ref]                       | 17.6 [1.9]                      |
| CHF                                 | 34,328 (30.3)               | 34.4 [8.4]                      | 30.5 [Ref]                       | 26.3 [9.4]                      |
| COPD                                | 31,448 (27.8)               | 29.8 [5.0]                      | 27.6 [Ref]                       | 26.7 [2.0]                      |
| Dementia                            | 3,303 (2.9)                 | 3.6 [4.7]                       | 2.8 [Ref]                        | 2.8 [0.2]                       |
| Diabetes                            | 54,209 (47.8)               | 49.4 [2.8]                      | 48.0 [Ref]                       | 46.2 [3.5]                      |
| Liver disease                       | 2,157 (1.9)                 | 2.3 [3.6]                       | 1.8 [Ref]                        | 1.9 [1.0]                       |
| Metastatic cancer                   | 1,702 (1.5)                 | 2.0 [4.8]                       | 1.4 [Ref]                        | 1.4 [0.1]                       |
| Para-/hemiplegia                    | 1,236 (1.1)                 | 1.3 [2.0]                       | 1.0 [Ref]                        | 1.1 [0.9]                       |
| Peptic ulcer disease                | 1,994 (1.8)                 | 2.0 [2.4]                       | 1.7 [Ref]                        | 1.9 [2.0]                       |
| PVD                                 | 26,580 (2.3)                | 25.6 [4.8]                      | 23.5 [Ref]                       | 21.6 [4.4]                      |
| Renal disease                       | 21,592 (19.1)               | 21.2 [5.3]                      | 19.1 [Ref]                       | 17.1 [5.4]                      |
| Rheumatic disease                   | 4,204 (3.7)                 | 4.0 [2.0]                       | 3.6 [Ref]                        | 3.7 [0.2]                       |

| Patient Characteristics      | Total<br>N=113,296<br>N (%) | Adherence Change                |                                  |                                 |
|------------------------------|-----------------------------|---------------------------------|----------------------------------|---------------------------------|
|                              |                             | Decrease<br>N=18,502<br>% [ASD] | No Change<br>N=72,510<br>% [ASD] | Increase<br>N=22,284<br>% [ASD] |
| <b>CCI</b>                   |                             |                                 |                                  |                                 |
| Mean ± SD                    | 2.5 ± 2.3                   | 2.8 ± 2.4 [11.1]                | 2.5 ± 2.3 [Ref]                  | 2.4 ± 2.3 [7.1]                 |
| 0                            | 22,608 (20.0)               | 17.4 [6.2]                      | 19.8 [Ref]                       | 22.6 [7.0]                      |
| 1-2                          | 43,540 (38.4)               | 36.5 [4.5]                      | 38.7 [Ref]                       | 39.3 [1.3]                      |
| 3-5                          | 34,947 (30.8)               | 33.1 [4.4]                      | 31.0 [Ref]                       | 28.5 [5.5]                      |
| 6-8                          | 9,868 (8.7)                 | 10.4 [6.2]                      | 8.6 [Ref]                        | 7.6 [3.5]                       |
| 9 or more                    | 2,333 (2.1)                 | 2.6 [4.6]                       | 2.0 [Ref]                        | 1.9 [0.3]                       |
| <b>Other comorbidities</b>   |                             |                                 |                                  |                                 |
| Dementia/Alz‡                | 11,574 (10.2)               | 12.1 [7.0]                      | 9.9 [Ref]                        | 9.7 [0.7]                       |
| Depression                   | 17,464 (15.4)               | 17.3 [6.2]                      | 15.0 [Ref]                       | 15.3 [0.8]                      |
| CABG                         | 1,136 (1.0)                 | 1.1 [1.4]                       | 1.0 [Ref]                        | 1.0 [0.1]                       |
| PTCA/stent                   | 7,441 (6.6)                 | 7.2 [2.4]                       | 6.6 [Ref]                        | 5.8 [3.5]                       |
| IHD                          | 68,689 (60.6)               | 64.1 [5.6]                      | 61.4 [Ref]                       | 55.4 [12.1]                     |
| Unstable angina              | 6,112 (5.4)                 | 6.0 [2.3]                       | 5.5 [Ref]                        | 4.6 [3.9]                       |
| Lipid abnormalities          | 101,285 (89.4)              | 89.7 [0.5]                      | 89.6 [Ref]                       | 88.6 [3.0]                      |
| Rhabdo/myopathy              | 7,553 (6.7)                 | 7.6 [5.1]                       | 6.3 [Ref]                        | 7.0 [3.1]                       |
| <b>Pre-AMI medications</b>   |                             |                                 |                                  |                                 |
| Beta-blocker                 | 73,425 (64.8)               | 65.4 [2.0]                      | 66.4 [Ref]                       | 59.3 [14.8]                     |
| ACE inhibitor/ARB            | 75,501 (66.6)               | 67.0 [0.8]                      | 67.4 [Ref]                       | 64.0 [7.2]                      |
| <b>Index admission</b>       |                             |                                 |                                  |                                 |
| Subend infarction            | 90,299 (79.7)               | 81.4 [2.8]                      | 80.3 [Ref]                       | 76.3 [9.8]                      |
| CABG                         | 6,988 (6.2)                 | 5.3 [2.9]                       | 6.0 [Ref]                        | 7.6 [6.5]                       |
| PTCA/stent                   | 41,596 (36.7)               | 30.3 [12.9]                     | 36.4 [Ref]                       | 43.1 [13.7]                     |
| Platelet inhibitors          | 4,919 (4.3)                 | 3.6 [4.1]                       | 4.4 [Ref]                        | 4.9 [2.8]                       |
| Cardiac cath                 | 64,954 (57.3)               | 51.4 [10.8]                     | 56.8 [Ref]                       | 63.9 [14.5]                     |
| Angiocardiology              | 65,107 (57.5)               | 51.4 [11.7]                     | 57.2 [Ref]                       | 63.3 [12.4]                     |
| Cardiogenic shock            | 2,484 (2.2)                 | 2.2 [0.8]                       | 2.1 [Ref]                        | 2.6 [3.5]                       |
| Dysrhythmias                 | 35,365 (31.2)               | 31.7 [0.0]                      | 31.6 [Ref]                       | 29.4 [4.8]                      |
| Hypotension                  | 5,679 (5.0)                 | 5.1 [0.5]                       | 5.0 [Ref]                        | 5.1 [0.4]                       |
| Acute renal failure          | 17,876 (15.8)               | 17.7 [5.8]                      | 15.5 [Ref]                       | 14.9 [1.7]                      |
| Heart failure                | 45,681 (40.3)               | 43.3 [6.0]                      | 40.4 [Ref]                       | 37.7 [5.5]                      |
| <b>Length of stay (days)</b> |                             |                                 |                                  |                                 |
| Mean ± SD                    | 5.3 ± 5.0                   | 5.7 ± 5.8 [9.3]                 | 5.2 ± 4.8 [Ref]                  | 5.3 ± 4.9 [1.7]                 |
| 1-3                          | 49,896 (44.0)               | 40.6 [8.1]                      | 44.7 [Ref]                       | 44.9 [0.4]                      |
| 4-6                          | 35,187 (31.1)               | 31.6 [1.1]                      | 31.1 [Ref]                       | 30.4 [1.6]                      |
| 7-11                         | 19,525 (17.2)               | 18.9 [5.1]                      | 17.0 [Ref]                       | 16.7 [0.7]                      |
| 12+                          | 8,688 (7.7)                 | 8.8 [5.8]                       | 7.3 [Ref]                        | 8.1 [3.0]                       |

|                                | Total<br>N=113,296<br>N (%) | Adherence Change                |                                  |                                 |
|--------------------------------|-----------------------------|---------------------------------|----------------------------------|---------------------------------|
|                                |                             | Decrease<br>N=18,502<br>% [ASD] | No Change<br>N=72,510<br>% [ASD] | Increase<br>N=22,284<br>% [ASD] |
| <b>Patient Characteristics</b> |                             |                                 |                                  |                                 |
| Intensive care                 |                             |                                 |                                  |                                 |
| None                           | 28,655 (25.3)               | 25.6 [0.6]                      | 25.8 [Ref]                       | 23.3 [5.8]                      |
| CCU only                       | 26,295 (23.2)               | 22.3 [1.8]                      | 23.1 [Ref]                       | 24.4 [3.2]                      |
| ICU only                       | 46,625 (41.2)               | 42.1 [2.2]                      | 41.0 [Ref]                       | 40.8 [0.4]                      |
| Both                           | 11,721 (10.3)               | 10.0 [0.1]                      | 10.1 [Ref]                       | 11.4 [4.3]                      |
| Cardiologist consult           | 97,977 (86.5)               | 85.3 [3.1]                      | 86.4 [Ref]                       | 87.7 [3.8]                      |
| <b>30-day follow-up</b>        |                             |                                 |                                  |                                 |
| None                           | 17,186 (15.2)               | 15.8 [1.9]                      | 15.1 [Ref]                       | 14.9 [0.4]                      |
| PCP only§                      | 33,332 (29.4)               | 31.0 [3.5]                      | 29.4 [Ref]                       | 28.0 [3.2]                      |
| Cardiologist only              | 20,292 (17.9)               | 16.2 [5.1]                      | 18.1 [Ref]                       | 18.8 [1.9]                      |
| Both                           | 42,486 (37.5)               | 37.0 [0.7]                      | 37.4 [Ref]                       | 38.3 [1.8]                      |
| Simvastatin ADD<br>change¶     | 2.7 ± 34.3                  | -8.6 ± 36.4 [35.4]              | 3.5 ± 32.0 [Ref]                 | 9.7 ± 37.0 [17.8]               |
| <b>Pre-AMI statin#</b>         |                             |                                 |                                  |                                 |
| Low intensity                  | 12,216 (10.8)               | 10.4 [1.5]                      | 10.9 [Ref]                       | 10.8 [0.1]                      |
| Moderate intensity             | 76,914 (67.9)               | 67.5 [1.1]                      | 68.0 [Ref]                       | 67.9 [0.2]                      |
| High intensity                 | 24,166 (21.3)               | 22.4 [2.4]                      | 21.1 [Ref]                       | 21.2 [0.3]                      |
| <b>Post-AMI statin#</b>        |                             |                                 |                                  |                                 |
| Low intensity                  | 9,442 (8.3)                 | 9.4 [3.4]                       | 8.4 [Ref]                        | 7.2 [4.4]                       |
| Moderate intensity             | 72,897 (6.4)                | 65.7 [2.3]                      | 64.6 [Ref]                       | 62.5 [4.2]                      |
| High intensity                 | 30,957 (27.3)               | 25.0 [4.7]                      | 27.0 [Ref]                       | 30.2 [7.1]                      |
| <b>Pre-AMI PDC</b>             |                             |                                 |                                  |                                 |
| <40%                           | 18,205 (16.1)               | 0.0 [49.7]                      | 11.0 [Ref]                       | 45.9 [83.8]                     |
| 40-79.9%                       | 24,373 (21.5)               | 26.1 [41.7]                     | 10.3 [Ref]                       | 54.1 [106.0]                    |
| ≥80%                           | 70,718 (62.4)               | 73.9 [11.1]                     | 78.7 [Ref]                       | 0.0 [271.5]                     |
| <b>Post-AMI PDC</b>            |                             |                                 |                                  |                                 |
| <40%                           | 17,104 (15.1)               | 49.3 [91.9]                     | 11.0 [Ref]                       | 0.0 [49.7]                      |
| 40-79.9%                       | 21,348 (18.8)               | 50.7 [97.5]                     | 10.3 [Ref]                       | 20.1 [27.4]                     |
| ≥80%                           | 74,844 (66.1)               | 0.0 [271.5]                     | 78.7 [Ref]                       | 79.9 [3.1]                      |

Percentages are column percentages. \*Enrolled in Medicare and Medicaid. †Median household income of US Census block groups for individuals aged 65 and older. ‡Medicare Chronic Condition Data Warehouse definition. §Primary care physician, physician assistant, or nurse practitioner. ¶Weighted average of the simvastatin-equivalent average daily dose in the post-AMI period minus the weighted average of the pre-AMI period. #According to the 2013 American College of Cardiology/ American Heart Association guidelines on the reduction of atherosclerotic cardiovascular risk. *Abbreviations:* AMI=acute myocardial infarction; PDC=proportion of days covered; ASD=absolute standardized difference; Ref=reference group for ASD calculation; SD=standard deviation; CCI=Charlson Comorbidity Index; CeVD=cerebrovascular disease; CHF=congestive heart failure; COPD=chronic obstructive pulmonary disease; PVD=peripheral vascular disease; CCW=Alz=Alzheimer's disease; CABG=Coronary artery bypass surgery; PTCA=percutaneous transluminal coronary angioplasty; IHD=ischemic heart disease; ACE=angiotensin-converting enzyme; ARB=angiotensin II receptor blocker; subend=subendocardial; Rhabdo=rhabdomyolysis; Cardiac cath=cardiac catheterization; CCU=coronary care unit; ICU=intensive care unit; PCP=primary care provider; ADD=average daily dose.

**Table S2.** Patient characteristics stratified by pre-AMI statin adherence.

| Patient Characteristics  | Pre-AMI PDC                 |                                 |                             |
|--------------------------|-----------------------------|---------------------------------|-----------------------------|
|                          | <40%<br>N=18,205<br>% [ASD] | 40-79.9%<br>N=24,373<br>% [ASD] | ≥80%<br>N=70,718<br>% [ASD] |
| <b>Age</b>               |                             |                                 |                             |
| Mean ± SD                | 76.7 ± 7.3 [12.0]           | 76.9 ± 7.2 [9.5]                | 77.6 ± 7.4 [Ref]            |
| 66-75                    | 48.7 [11.0]                 | 47.3 [8.2]                      | 43.3 [Ref]                  |
| 76-85                    | 37.7 [5.0]                  | 39.0 [2.3]                      | 40.1 [Ref]                  |
| 86+                      | 13.6 [8.5]                  | 13.7 [8.2]                      | 16.6 [Ref]                  |
| Female                   | 55.6 [4.0]                  | 55.4 [3.6]                      | 53.6 [Ref]                  |
| <b>Race/ethnicity</b>    |                             |                                 |                             |
| White                    | 80.0 [17.1]                 | 81.5 [13.3]                     | 86.3 [Ref]                  |
| Black                    | 12.2 [17.9]                 | 10.6 [13.1]                     | 6.9 [Ref]                   |
| Hispanic                 | 3.9 [7.4]                   | 3.6 [6.2]                       | 2.6 [Ref]                   |
| Asian                    | 2.1 [1.2]                   | 2.1 [0.9]                       | 2.3 [Ref]                   |
| Other                    | 1.9 [0.3]                   | 2.1 [1.7]                       | 1.9 [Ref]                   |
| Dual eligibility*        | 25.6 [1.4]                  | 25.0 [0.0]                      | 25.0 [Ref]                  |
| <b>Household income†</b> |                             |                                 |                             |
| ≤\$30,000                | 49.4 [6.1]                  | 47.6 [2.4]                      | 46.4 [Ref]                  |
| \$30,001-60,000          | 40.0 [3.6]                  | 40.9 [1.6]                      | 41.7 [Ref]                  |
| \$60,001-100,000         | 8.7 [2.9]                   | 9.3 [0.8]                       | 9.5 [Ref]                   |
| \$100,001-150,000        | 1.5 [2.7]                   | 1.7 [1.1]                       | 1.8 [Ref]                   |
| >\$150,000               | 0.5 [1.4]                   | 0.6 [0.0]                       | 0.6 [Ref]                   |
| <b>CCI comorbidities</b> |                             |                                 |                             |
| AMI                      | 5.2 [3.0]                   | 4.5 [0.2]                       | 4.5 [Ref]                   |
| Cancer                   | 12.1 [0.4]                  | 12.2 [0.1]                      | 12.2 [Ref]                  |
| CeVD                     | 18.5 [0.5]                  | 18.9 [1.6]                      | 18.3 [Ref]                  |
| CHF                      | 29.5 [2.4]                  | 30.0 [1.2]                      | 30.6 [Ref]                  |
| COPD                     | 29.2 [4.1]                  | 27.7 [0.7]                      | 27.4 [Ref]                  |
| Dementia                 | 3.2 [2.5]                   | 3.1 [1.7]                       | 2.8 [Ref]                   |
| Diabetes                 | 47.1 [1.9]                  | 47.7 [0.9]                      | 48.1 [Ref]                  |
| Liver disease            | 2.2 [3.4]                   | 2.2 [3.3]                       | 1.7 [Ref]                   |
| Metastatic cancer        | 1.8 [3.4]                   | 1.7 [2.4]                       | 1.4 [Ref]                   |
| Para-/hemiplegia         | 1.2 [1.1]                   | 1.1 [0.7]                       | 1.1 [Ref]                   |
| Peptic ulcer disease     | 2.0 [2.8]                   | 2.0 [2.7]                       | 1.6 [Ref]                   |
| PVD                      | 23.6 [0.5]                  | 23.5 [0.1]                      | 23.4 [Ref]                  |
| Renal disease            | 18.4 [2.6]                  | 18.6 [2.1]                      | 19.4 [Ref]                  |
| Rheumatic disease        | 4.0 [1.7]                   | 3.8 [0.6]                       | 3.6 [Ref]                   |

| Patient Characteristics      | Pre-AMI PDC                 |                                 |                             |
|------------------------------|-----------------------------|---------------------------------|-----------------------------|
|                              | <40%<br>N=18,205<br>% [ASD] | 40-79.9%<br>N=24,373<br>% [ASD] | ≥80%<br>N=70,718<br>% [ASD] |
| <b>CCI</b>                   |                             |                                 |                             |
| Mean ± SD                    | 2.5 ± 2.4 [0.9]             | 2.5 ± 2.4 [0.5]                 | 2.5 ± 2.3 [Ref]             |
| 0                            | 20.2 [1.0]                  | 20.3 [1.2]                      | 19.8 [Ref]                  |
| 1-2                          | 38.2 [0.6]                  | 38.5 [0.0]                      | 38.5 [Ref]                  |
| 3-5                          | 30.5 [1.4]                  | 30.2 [2.0]                      | 31.1 [Ref]                  |
| 6-8                          | 8.7 [0.1]                   | 8.8 [0.2]                       | 8.7 [Ref]                   |
| 9 or more                    | 2.4 [3.6]                   | 2.3 [2.5]                       | 1.9 [Ref]                   |
| <b>Other comorbidities</b>   |                             |                                 |                             |
| Dementia/Alz‡                | 10.3 [0.5]                  | 10.5 [1.2]                      | 10.1 [Ref]                  |
| Depression                   | 15.7 [1.6]                  | 16.0 [2.4]                      | 15.1 [Ref]                  |
| CABG                         | 0.9 [1.6]                   | 1.1 [0.4]                       | 1.0 [Ref]                   |
| PTCA/stent                   | 7.0 [2.0]                   | 6.6 [0.6]                       | 6.5 [Ref]                   |
| IHD                          | 58.7 [5.0]                  | 60.7 [0.9]                      | 61.1 [Ref]                  |
| Unstable angina              | 5.5 [0.6]                   | 5.4 [0.0]                       | 5.4 [Ref]                   |
| Lipid abnormalities          | 87.5 [7.0]                  | 89.9 [0.6]                      | 89.7 [Ref]                  |
| Rhabdo/myopathy              | 7.9 [6.9]                   | 7.1 [3.9]                       | 6.2 [Ref]                   |
| <b>Pre-AMI medications</b>   |                             |                                 |                             |
| Beta-blocker                 | 57.8 [19.1]                 | 63.6 [7.2]                      | 67.0 [Ref]                  |
| ACE inhibitor/ARB            | 60.2 [17.0]                 | 66.5 [3.9]                      | 68.3 [Ref]                  |
| <b>Index admission</b>       |                             |                                 |                             |
| Subend infarction            | 78.1 [5.8]                  | 78.7 [4.3]                      | 80.4 [Ref]                  |
| CABG                         | 6.4 [1.3]                   | 6.3 [0.9]                       | 6.1 [Ref]                   |
| PTCA/stent                   | 39.3 [7.5]                  | 37.8 [4.4]                      | 35.7 [Ref]                  |
| Platelet inhibitors          | 4.7 [2.6]                   | 4.5 [1.6]                       | 4.2 [Ref]                   |
| Cardiac cath                 | 60.2 [8.2]                  | 58.8 [5.5]                      | 56.1 [Ref]                  |
| Angiocardiology              | 59.5 [6.1]                  | 58.9 [5.0]                      | 56.4 [Ref]                  |
| Cardiogenic shock            | 2.1 [0.0]                   | 2.4 [1.8]                       | 2.1 [Ref]                   |
| Dysrhythmias                 | 30.2 [3.8]                  | 29.9 [4.5]                      | 31.9 [Ref]                  |
| Hypotension                  | 4.8 [1.2]                   | 5.1 [0.2]                       | 5.0 [Ref]                   |
| Acute renal failure          | 15.1 [2.5]                  | 15.7 [0.8]                      | 16.0 [Ref]                  |
| Heart failure                | 38.7 [4.6]                  | 39.5 [2.9]                      | 41.0 [Ref]                  |
| <b>Length of stay (days)</b> |                             |                                 |                             |
| Mean ± SD                    | 5.3 ± 5.1 [0.7]             | 5.3 ± 4.9 [0.5]                 | 5.3 ± 5.0 [Ref]             |
| 1-3                          | 44.3 [1.0]                  | 44.6 [1.7]                      | 43.8 [Ref]                  |
| 4-6                          | 31.4 [0.6]                  | 30.7 [0.9]                      | 31.1 [Ref]                  |
| 7-11                         | 16.7 [2.1]                  | 16.8 [2.0]                      | 17.5 [Ref]                  |
| 12+                          | 7.7 [0.2]                   | 7.9 [1.2]                       | 7.6 [Ref]                   |

|                         | Pre-AMI PDC        |                  |                  |
|-------------------------|--------------------|------------------|------------------|
|                         | <40%               | 40-79.9%         | ≥80%             |
|                         | N=18,205           | N=24,373         | N=70,718         |
| Patient Characteristics | % [ASD]            | % [ASD]          | % [ASD]          |
| Intensive care          |                    |                  |                  |
| None                    | 24.2 [3.4]         | 25.0 [1.4]       | 25.7 [Ref]       |
| CCU only                | 24.2 [3.1]         | 23.4 [1.2]       | 22.9 [Ref]       |
| ICU only                | 40.8 [1.1]         | 40.7 [1.3]       | 41.4 [Ref]       |
| Both                    | 10.8 [2.3]         | 10.8 [2.4]       | 10.1 [Ref]       |
| Cardiologist consult    | 86.7 [1.1]         | 86.7 [1.1]       | 86.3 [Ref]       |
| 30-day follow-up        |                    |                  |                  |
| None                    | 17.0 [6.7]         | 15.7 [3.3]       | 14.5 [Ref]       |
| PCP only§               | 29.6 [0.4]         | 29.4 [0.0]       | 29.4 [Ref]       |
| Cardiologist only       | 17.7 [0.3]         | 18.2 [1.0]       | 17.8 [Ref]       |
| Both                    | 35.8 [5.1]         | 36.7 [3.3]       | 38.2 [Ref]       |
| Simvastatin ADD change¶ | -4.0 ± 43.8 [23.3] | 2.1 ± 36.0 [8.0] | 4.7 ± 30.4 [Ref] |
| Pre-AMI statin#         |                    |                  |                  |
| Low intensity           | 11.4 [1.7]         | 9.7 [4.0]        | 11.0 [Ref]       |
| Moderate intensity      | 66.9 [3.4]         | 66.9 [3.3]       | 68.5 [Ref]       |
| High intensity          | 21.6 [2.6]         | 23.3 [6.6]       | 20.6 [Ref]       |
| Post-AMI statin#        |                    |                  |                  |
| Low intensity           | 8.7 [0.7]          | 7.7 [3.0]        | 8.5 [Ref]        |
| Moderate intensity      | 63.8 [2.4]         | 62.9 [4.2]       | 65.0 [Ref]       |
| High intensity          | 27.5 [2.1]         | 29.4 [6.3]       | 26.6 [Ref]       |
| Post-AMI PDC            |                    |                  |                  |
| <40%                    | 43.8 [96.9]        | 19.8 [41.7]      | 6.1 [Ref]        |
| 40-79.9%                | 24.6 [29.3]        | 30.7 [43.2]      | 13.3 [Ref]       |
| ≥80%                    | 31.6 [113.8]       | 49.5 [69.2]      | 80.7 [Ref]       |

Percentages are column percentages. \*Enrolled in Medicare and Medicaid. †Median household income of US Census block groups for individuals aged 65 and older. ‡Medicare Chronic Condition Data Warehouse definition. §Primary care physician, physician assistant, or nurse practitioner. ¶Weighted average of the simvastatin-equivalent average daily dose in the post-AMI period minus the weighted average of the pre-AMI period. #According to the 2013 American College of Cardiology/ American Heart Association guidelines on the reduction of atherosclerotic cardiovascular risk. Abbreviations: AMI=acute myocardial infarction; PDC=proportion of days covered; ASD=absolute standardized difference; Ref=reference group for ASD calculation; SD=standard deviation; CCI=Charlson Comorbidity Index; CeVD=cerebrovascular disease; CHF=congestive heart failure; COPD=chronic obstructive pulmonary disease; PVD=peripheral vascular disease; CCW=Alz=Alzheimer's disease; CABG=Coronary artery bypass surgery; PTCA=percutaneous transluminal coronary angioplasty; IHD=ischemic heart disease; ACE=angiotensin-converting enzyme; ARB=angiotensin II receptor blocker; subend=subendocardial; Rhabdo=rhabdomyolysis; Cardiac cath=cardiac catheterization; CCU=coronary care unit; ICU=intensive care unit; PCP=primary care provider; ADD=average daily dose.

**Table S3.** Patient characteristics stratified by post-AMI statin adherence.

| Patient Characteristics  | Post-AMI PDC                |                                 |                             |
|--------------------------|-----------------------------|---------------------------------|-----------------------------|
|                          | <40%<br>N=17,104<br>% [ASD] | 40-79.9%<br>N=21,348<br>% [ASD] | ≥80%<br>N=74,844<br>% [ASD] |
| <b>Age</b>               |                             |                                 |                             |
| Mean ± SD                | 77.5 ± 7.5 [3.1]            | 77.0 ± 7.3 [4.6]                | 77.3 ± 7.3 [Ref]            |
| 66-75                    | 44.1 [1.3]                  | 46.8 [4.2]                      | 44.7 [Ref]                  |
| 76-85                    | 39.2 [1.1]                  | 38.8 [1.9]                      | 39.8 [Ref]                  |
| 86+                      | 16.7 [3.2]                  | 14.3 [3.3]                      | 15.5 [Ref]                  |
| Female                   | 55.5 [3.4]                  | 55.1 [2.6]                      | 53.8 [Ref]                  |
| <b>Race/ethnicity</b>    |                             |                                 |                             |
| White                    | 82.2 [8.7]                  | 82.0 [9.2]                      | 85.4 [Ref]                  |
| Black                    | 10.9 [11.9]                 | 10.4 [10.0]                     | 7.5 [Ref]                   |
| Hispanic                 | 3.3 [2.8]                   | 3.5 [3.8]                       | 2.8 [Ref]                   |
| Asian                    | 1.7 [4.7]                   | 2.0 [2.4]                       | 2.4 [Ref]                   |
| Other                    | 1.9 [0.2]                   | 2.1 [1.6]                       | 1.9 [Ref]                   |
| Dual eligibility*        | 23.6 [5.2]                  | 24.0 [4.1]                      | 25.8 [Ref]                  |
| <b>Household income†</b> |                             |                                 |                             |
| ≤\$30,000                | 48.7 [4.2]                  | 47.7 [2.3]                      | 46.6 [Ref]                  |
| \$30,001-60,000          | 40.7 [1.7]                  | 40.7 [1.7]                      | 41.6 [Ref]                  |
| \$60,001-100,000         | 8.6 [3.0]                   | 9.4 [0.5]                       | 9.5 [Ref]                   |
| \$100,001-150,000        | 1.5 [2.0]                   | 1.7 [0.4]                       | 1.8 [Ref]                   |
| >\$150,000               | 0.5 [1.3]                   | 0.5 [1.6]                       | 0.6 [Ref]                   |
| <b>CCI comorbidities</b> |                             |                                 |                             |
| AMI                      | 6.2 [8.8]                   | 4.6 [1.9]                       | 4.2 [Ref]                   |
| Cancer                   | 13.4 [4.8]                  | 12.3 [1.5]                      | 11.8 [Ref]                  |
| CeVD                     | 20.6 [7.2]                  | 19.1 [3.4]                      | 17.8 [Ref]                  |
| CHF                      | 35.9 [14.8]                 | 30.5 [3.4]                      | 29.0 [Ref]                  |
| COPD                     | 31.7 [10.7]                 | 28.0 [2.7]                      | 26.8 [Ref]                  |
| Dementia                 | 4.1 [8.2]                   | 2.9 [1.6]                       | 2.6 [Ref]                   |
| Diabetes                 | 49.1 [3.5]                  | 48.5 [2.2]                      | 47.4 [Ref]                  |
| Liver disease            | 2.6 [6.3]                   | 2.0 [1.9]                       | 1.7 [Ref]                   |
| Metastatic cancer        | 2.3 [7.8]                   | 1.5 [2.1]                       | 1.3 [Ref]                   |
| Para-/hemiplegia         | 1.4 [3.0]                   | 1.0 [0.4]                       | 1.0 [Ref]                   |
| Peptic ulcer disease     | 2.1 [3.4]                   | 1.9 [1.7]                       | 1.6 [Ref]                   |
| PVD                      | 26.5 [9.0]                  | 23.9 [3.1]                      | 22.6 [Ref]                  |
| Renal disease            | 21.5 [7.5]                  | 18.9 [0.9]                      | 18.5 [Ref]                  |
| Rheumatic disease        | 4.3 [3.3]                   | 3.6 [0.1]                       | 3.6 [Ref]                   |



| Patient Characteristics      | Post-AMI PDC        |                     |                     |
|------------------------------|---------------------|---------------------|---------------------|
|                              | <40%                | 40-79.9%            | ≥80%                |
|                              | N=17,104<br>% [ASD] | N=21,348<br>% [ASD] | N=74,844<br>% [ASD] |
| <b>CCI</b>                   |                     |                     |                     |
| Mean ± SD                    | 2.9 ± 2.5 [18.1]    | 2.6 ± 2.3 [5.0]     | 2.4 ± 2.3 [Ref]     |
| 0                            | 16.3 [11.8]         | 19.5 [3.6]          | 20.9 [Ref]          |
| 1-2                          | 36.0 [6.2]          | 38.2 [1.7]          | 39.0 [Ref]          |
| 3-5                          | 33.6 [7.7]          | 31.6 [3.4]          | 30.0 [Ref]          |
| 6-8                          | 10.9 [9.3]          | 8.6 [1.5]           | 8.2 [Ref]           |
| 9 or more                    | 3.1 [8.3]           | 2.1 [2.2]           | 1.8 [Ref]           |
| <b>Other comorbidities</b>   |                     |                     |                     |
| Dementia/Alz‡                | 12.5 [8.9]          | 10.3 [2.3]          | 9.7 [Ref]           |
| Depression                   | 17.2 [6.6]          | 16.2 [3.8]          | 14.8 [Ref]          |
| CABG                         | 1.0 [0.5]           | 1.0 [0.2]           | 1.0 [Ref]           |
| PTCA/stent                   | 8.0 [7.2]           | 6.9 [3.0]           | 6.2 [Ref]           |
| IHD                          | 65.5 [13.1]         | 61.7 [5.2]          | 59.2 [Ref]          |
| Unstable angina              | 6.4 [5.6]           | 5.6 [2.5]           | 5.1 [Ref]           |
| Lipid abnormalities          | 88.6 [3.1]          | 89.7 [0.5]          | 89.5 [Ref]          |
| Rhabdo/myopathy              | 8.3 [8.6]           | 7.2 [4.4]           | 6.1 [Ref]           |
| <b>Pre-AMI medications</b>   |                     |                     |                     |
| Beta-blocker                 | 62.9 [5.5]          | 63.9 [3.2]          | 65.5 [Ref]          |
| ACE inhibitor/ARB            | 62.9 [9.9]          | 66.2 [3.0]          | 67.6 [Ref]          |
| <b>Index admission</b>       |                     |                     |                     |
| Subend infarction            | 81.4 [5.7]          | 80.3 [2.7]          | 79.2 [Ref]          |
| CABG                         | 4.6 [8.7]           | 6.1 [1.8]           | 6.5 [Ref]           |
| PTCA/stent                   | 30.1 [17.6]         | 36.0 [5.1]          | 38.4 [Ref]          |
| Platelet inhibitors          | 3.8 [3.4]           | 4.2 [1.3]           | 4.5 [Ref]           |
| Cardiac cath                 | 50.8 [16.0]         | 57.7 [2.2]          | 58.7 [Ref]          |
| Angiocardiology              | 50.8 [16.3]         | 57.6 [2.7]          | 58.9 [Ref]          |
| Cardiogenic shock            | 1.9 [2.5]           | 2.1 [1.0]           | 2.3 [Ref]           |
| Dysrhythmias                 | 31.4 [0.1]          | 30.6 [1.7]          | 31.4 [Ref]          |
| Hypotension                  | 5.0 [0.5]           | 4.8 [1.1]           | 5.1 [Ref]           |
| Acute renal failure          | 17.0 [4.3]          | 15.9 [1.4]          | 15.4 [Ref]          |
| Heart failure                | 43.3 [7.0]          | 39.6 [0.5]          | 39.8 [Ref]          |
| <b>Length of stay (days)</b> |                     |                     |                     |
| Mean ± SD                    | 5.6 ± 5.8 [6.7]     | 5.3 ± 5.0 [1.5]     | 5.2 ± 4.8 [Ref]     |
| 1-3                          | 41.2 [6.8]          | 44.3 [0.5]          | 44.6 [Ref]          |
| 4-6                          | 32.1 [2.6]          | 30.9 [0.1]          | 30.9 [Ref]          |
| 7-11                         | 18.2 [3.1]          | 17.1 [0.0]          | 17.1 [Ref]          |
| 12+                          | 8.5 [3.7]           | 7.7 [0.7]           | 7.5 [Ref]           |

|                         | Post-AMI PDC        |                      |                  |
|-------------------------|---------------------|----------------------|------------------|
|                         | <40%<br>N=17,104    | 40-79.9%<br>N=21,348 | ≥80%<br>N=74,844 |
| Patient Characteristics | % [ASD]             | % [ASD]              | % [ASD]          |
| Intensive care          |                     |                      |                  |
| None                    | 26.3 [2.7]          | 24.9 [0.6]           | 25.2 [Ref]       |
| CCU only                | 22.4 [2.2]          | 23.3 [0.0]           | 23.3 [Ref]       |
| ICU only                | 41.4 [0.8]          | 41.3 [0.5]           | 41.1 [Ref]       |
| Both                    | 9.8 [2.1]           | 10.5 [0.2]           | 10.4 [Ref]       |
| Cardiologist consult    | 84.8 [5.8]          | 86.6 [0.7]           | 86.8 [Ref]       |
| 30-day follow-up        |                     |                      |                  |
| None                    | 17.8 [9.2]          | 15.6 [3.1]           | 14.4 [Ref]       |
| PCP only§               | 32.1 [7.4]          | 29.8 [2.5]           | 28.7 [Ref]       |
| Cardiologist only       | 15.7 [7.0]          | 18.0 [1.0]           | 18.4 [Ref]       |
| Both                    | 34.3 [8.6]          | 36.6 [3.9]           | 38.5 [Ref]       |
| Simvastatin ADD change¶ | -20.7 ± 41.0 [78.4] | 3.7 ± 31.0 [13.1]    | 7.8 ± 31.1 [Ref] |
| Pre-AMI statin#         |                     |                      |                  |
| Low intensity           | 11.5 [1.2]          | 9.0 [7.0]            | 11.1 [Ref]       |
| Moderate intensity      | 66.9 [3.7]          | 66.1 [5.4]           | 68.6 [Ref]       |
| High intensity          | 21.6 [3.4]          | 24.9 [11.1]          | 20.3 [Ref]       |
| Post-AMI statin#        |                     |                      |                  |
| Low intensity           | 10.5 [8.4]          | 7.4 [2.4]            | 8.1 [Ref]        |
| Moderate intensity      | 66.0 [3.5]          | 63.1 [2.7]           | 64.3 [Ref]       |
| High intensity          | 23.5 [9.4]          | 29.5 [4.2]           | 27.6 [Ref]       |
| Pre-AMI PDC             |                     |                      |                  |
| <40%                    | 46.6 [97.5]         | 21.0 [38.7]          | 7.7 [Ref]        |
| 40-79.9%                | 28.2 [29.4]         | 35.1 [44.6]          | 16.1 [Ref]       |
| ≥80%                    | 25.2 [118.8]        | 43.9 [69.8]          | 76.2 [Ref]       |

Percentages are column percentages. \*Enrolled in Medicare and Medicaid. †Median household income of US Census block groups for individuals aged 65 and older. ‡Medicare Chronic Condition Data Warehouse definition. §Primary care physician, physician assistant, or nurse practitioner. ¶Weighted average of the simvastatin-equivalent average daily dose in the post-AMI period minus the weighted average of the pre-AMI period. #According to the 2013 American College of Cardiology/ American Heart Association guidelines on the reduction of atherosclerotic cardiovascular risk. *Abbreviations:* AMI=acute myocardial infarction; PDC=proportion of days covered; ASD=absolute standardized difference; Ref=reference group for ASD calculation; SD=standard deviation; CCI=Charlson Comorbidity Index; CeVD=cerebrovascular disease; CHF=congestive heart failure; COPD=chronic obstructive pulmonary disease; PVD=peripheral vascular disease; CCW=Alz=Alzheimer's disease; CABG=Coronary artery bypass surgery; PTCA=percutaneous transluminal coronary angioplasty; IHD=ischemic heart disease; ACE=angiotensin-converting enzyme; ARB=angiotensin II receptor blocker; subend=subendocardial; Rhabdo=rhabdomyolysis; Cardiac cath=cardiac catheterization; CCU=coronary care unit; ICU=intensive care unit; PCP=primary care provider; ADD=average daily dose.

**Table S4.** Full model for 3-level multinomial regression model predicting statin adherence change after an AMI.

| Patient Characteristics | Model 1: 3-Level Multinomial |                   |
|-------------------------|------------------------------|-------------------|
|                         | <u>Logistic Regression*</u>  |                   |
|                         | OR (99% CI)                  |                   |
|                         | Decrease                     | Increase          |
| Pre-AMI PDC (10%)†      | 1.04 (1.03, 1.05)            | 0.67 (0.67, 0.68) |
| Age                     |                              |                   |
| 66-75                   | 1.                           | 1.                |
| 76-85                   | 0.99 (0.94, 1.04)            | 0.97 (0.92, 1.02) |
| 86+                     | 0.99 (0.92, 1.06)            | 0.88 (0.81, 0.95) |
| Female                  | 1.03 (0.98, 1.08)            | 1.06 (1.01, 1.12) |
| Race/ethnicity          |                              |                   |
| White                   | 1.                           | 1.                |
| Black                   | 1.21 (1.12, 1.31)            | 1.14 (1.05, 1.23) |
| Hispanic                | 1.30 (1.15, 1.48)            | 1.29 (1.13, 1.48) |
| Asian                   | 0.97 (0.83, 1.14)            | 1.16 (0.99, 1.36) |
| Other                   | 1.22 (1.05, 1.42)            | 1.15 (0.97, 1.36) |
| Dual eligibility‡       | 0.80 (0.75, 0.84)            | 1.18 (1.11, 1.25) |
| Household income§       |                              |                   |
| ≤\$30,000               | 1.                           | 1.                |
| \$30,001-60,000         | 0.96 (0.91, 1.00)            | 0.98 (0.93, 1.03) |
| \$60,001-100,000        | 0.96 (0.89, 1.04)            | 1.03 (0.95, 1.12) |
| \$100,001-150,000       | 1.01 (0.86, 1.19)            | 1.05 (0.87, 1.26) |
| >\$150,000              | 0.79 (0.58, 1.08)            | 1.10 (0.80, 1.51) |
| Adjusted CCII           |                              |                   |
| 0                       | 1.                           | 1.                |
| 1-2                     | 1.03 (0.97, 1.10)            | 0.88 (0.83, 0.94) |
| 3-5                     | 1.08 (1.01, 1.15)            | 0.84 (0.79, 0.91) |
| 6-8                     | 1.14 (1.04, 1.26)            | 0.81 (0.73, 0.91) |
| 9 or more               | 1.39 (1.19, 1.62)            | 0.77 (0.64, 0.93) |
| Baseline comorbidities  |                              |                   |
| Prior AMI#              | 1.04 (0.94, 1.15)            | 0.92 (0.81, 1.04) |
| Dementia/Alz**          | 1.13 (1.06, 1.21)            | 1.05 (0.97, 1.14) |
| Depression              | 1.11 (1.05, 1.18)            | 1.02 (0.95, 1.09) |
| CABG                    | 1.13 (0.92, 1.39)            | 1.28 (1.01, 1.62) |
| PTCA/stent              | 1.12 (1.02, 1.23)            | 0.85 (0.76, 0.95) |
| Ischemic heart disease  | 1.09 (1.04, 1.15)            | 0.84 (0.79, 0.89) |
| Unstable angina         | 1.04 (0.94, 1.15)            | 0.89 (0.79, 1.00) |
| Lipid abnormalities     | 1.00 (0.93, 1.07)            | 1.07 (0.99, 1.16) |
| Rhabdomyolysis/myopathy | 1.15 (1.05, 1.24)            | 1.01 (0.92, 1.11) |

| Model 1: 3-Level Multinomial |                   |                   |
|------------------------------|-------------------|-------------------|
| <u>Logistic Regression*</u>  |                   |                   |
| OR (99% CI)                  |                   |                   |
| Patient Characteristics      | Decrease          | Increase          |
| Concurrent medications       |                   |                   |
| Beta-blocker                 | 0.88 (0.84, 0.93) | 0.99 (0.94, 1.04) |
| ACE inhibitor/ARB            | 0.95 (0.91, 1.00) | 1.10 (1.05, 1.16) |
| Index admission              |                   |                   |
| Subendocardial infarction††  | 0.97 (0.92, 1.03) | 0.90 (0.85, 0.96) |
| CABG                         | 0.78 (0.71, 0.87) | 1.34 (1.21, 1.49) |
| PTCA/stent                   | 0.82 (0.78, 0.87) | 1.25 (1.17, 1.32) |
| Platelet inhibitors          | 0.91 (0.81, 1.02) | 1.00 (0.89, 1.12) |
| Cardiac catheterization      | 1.03 (0.95, 1.12) | 1.09 (1.00, 1.19) |
| Angiocardiology              | 0.90 (0.82, 0.97) | 1.05 (0.97, 1.15) |
| Cardiogenic shock            | 1.04 (0.90, 1.21) | 1.14 (0.98, 1.34) |
| Cardiac dysrhythmias         | 1.00 (0.95, 1.05) | 0.93 (0.88, 0.98) |
| Hypotension                  | 1.01 (0.91, 1.11) | 1.05 (0.94, 1.16) |
| Acute renal failure          | 1.05 (0.99, 1.12) | 1.00 (0.93, 1.07) |
| Heart failure                | 1.02 (0.98, 1.07) | 1.00 (0.95, 1.06) |
| Length of stay (days)        |                   |                   |
| 1-3                          | 1.                | 1.                |
| 4-6                          | 1.05 (1.00, 1.11) | 1.00 (0.94, 1.06) |
| 7-11                         | 1.14 (1.07, 1.22) | 1.02 (0.95, 1.10) |
| 12+                          | 1.27 (1.16, 1.39) | 1.08 (0.97, 1.20) |
| Intensive care               |                   |                   |
| None                         | 1.                | 1.                |
| Coronary care unit only      | 1.03 (0.96, 1.09) | 1.03 (0.96, 1.11) |
| Intensive care unit only     | 1.05 (1.00, 1.11) | 1.01 (0.95, 1.07) |
| Both                         | 1.04 (0.96, 1.13) | 1.03 (0.94, 1.12) |
| Cardiologist consult         | 0.95 (0.89, 1.01) | 1.04 (0.96, 1.11) |
| 30-day follow-up             |                   |                   |
| None                         | 1.                | 1.                |
| PCP only‡‡                   | 0.97 (0.91, 1.04) | 1.08 (1.00, 1.16) |
| Cardiologist only            | 0.91 (0.84, 0.98) | 1.15 (1.05, 1.25) |
| Both                         | 0.95 (0.89, 1.02) | 1.21 (1.12, 1.30) |

\*Three-level multinomial logistic regression comparing decrease in adherence to no change and comparing increase in adherence to no change. †Odds ratio for a 10% higher pre-AMI adherence (e.g. 50% compared to 40%). ‡Enrolled in Medicare and Medicaid. §Median household income of US Census block groups for individuals aged 65 and older. ICCI score does not include counts for AMI and dementia. #CCI definition.

\*\*Medicare Chronic Condition Data Warehouse definition. ††Diagnosis code for subendocardial infarction, compared to a transmural infarction. ‡‡Primary care physician, physician assistant, or nurse practitioner. Abbreviations: AMI=acute myocardial infarction; OR=odds ratio; CI=confidence interval; PDC=proportion of days covered; CCI=Charlson Comorbidity Index; Alz=Alzheimer's disease; CABG=Coronary artery bypass surgery; PTCA=percutaneous transluminal coronary angioplasty; ACE=angiotensin-converting enzyme; ARB=angiotensin II receptor blocker; PCP=primary care provider.

**Table S5.** Full model for five-level multinomial regression model predicting statin adherence change after an AMI.

| Patient Characteristics         | Model 2: 5-Level Multinomial Logistic Regression* |                                       |                                       |                               |
|---------------------------------|---------------------------------------------------|---------------------------------------|---------------------------------------|-------------------------------|
|                                 | OR (99% CI)<br>Major Decrease                     | OR (99% CI)<br>Mild/Moderate Decrease | OR (99% CI)<br>Mild/Moderate Increase | OR (99% CI)<br>Major Increase |
| Pre-AMI PDC (10%) <sup>†‡</sup> | 1.48 (1.43, 1.54)                                 | 0.99 (0.98, 1.00)                     | 0.71 (0.71, 0.72)                     | 0.49 (0.48, 0.49)             |
| Age                             |                                                   |                                       |                                       |                               |
| 66-75                           | 1.                                                | 1.                                    | 1.                                    | 1.                            |
| 76-85                           | 0.95 (0.87, 1.05)                                 | 1.00 (0.95, 1.06)                     | 0.96 (0.91, 1.02)                     | 1.01 (0.92, 1.11)             |
| 86+                             | 0.99 (0.88, 1.12)                                 | 0.98 (0.91, 1.06)                     | 0.86 (0.79, 0.93)                     | 0.94 (0.81, 1.08)             |
| Female                          | 1.06 (0.97, 1.15)                                 | 1.02 (0.97, 1.07)                     | 1.07 (1.01, 1.12)                     | 1.04 (0.95, 1.14)             |
| Race/ethnicity                  |                                                   |                                       |                                       |                               |
| White                           | 1.                                                | 1.                                    | 1.                                    | 1.                            |
| Black                           | 1.25 (1.07, 1.45)                                 | 1.21 (1.11, 1.32)                     | 1.15 (1.06, 1.25)                     | 1.16 (1.01, 1.34)             |
| Hispanic                        | 1.29 (1.00, 1.64)                                 | 1.32 (1.15, 1.52)                     | 1.32 (1.15, 1.51)                     | 1.25 (1.00, 1.58)             |
| Asian                           | 0.87 (0.64, 1.19)                                 | 1.01 (0.84, 1.20)                     | 1.18 (1.00, 1.39)                     | 1.09 (0.82, 1.47)             |
| Other                           | 1.19 (0.88, 1.59)                                 | 1.24 (1.04, 1.46)                     | 1.14 (0.96, 1.36)                     | 1.27 (0.94, 1.71)             |
| Dual eligibility <sup>†</sup>   | 0.81 (0.73, 0.90)                                 | 0.79 (0.74, 0.84)                     | 1.13 (1.06, 1.20)                     | 1.46 (1.31, 1.63)             |
| Household income <sup>‡</sup>   |                                                   |                                       |                                       |                               |
| ≤\$30,000                       | 1.                                                | 1.                                    | 1.                                    | 1.                            |
| \$30,001-60,000                 | 0.95 (0.87, 1.04)                                 | 0.96 (0.91, 1.01)                     | 0.98 (0.93, 1.04)                     | 0.99 (0.90, 1.08)             |
| \$60,001-100,000                | 0.95 (0.82, 1.11)                                 | 0.96 (0.88, 1.05)                     | 1.03 (0.95, 1.13)                     | 1.05 (0.89, 1.22)             |
| \$100,001-150,000               | 0.91 (0.66, 1.25)                                 | 1.04 (0.87, 1.25)                     | 1.03 (0.85, 1.25)                     | 1.16 (0.82, 1.63)             |
| >\$150,000                      | 0.81 (0.45, 1.45)                                 | 0.79 (0.56, 1.11)                     | 1.13 (0.82, 1.56)                     | 0.90 (0.47, 1.70)             |
| Adjusted CCI <sup>§</sup>       |                                                   |                                       |                                       |                               |
| 0                               | 1.                                                | 1.                                    | 1.                                    | 1.                            |
| 1-2                             | 1.01 (0.90, 1.14)                                 | 1.04 (0.97, 1.11)                     | 0.89 (0.83, 0.95)                     | 0.82 (0.73, 0.92)             |
| 3-5                             | 1.07 (0.94, 1.22)                                 | 1.08 (1.00, 1.17)                     | 0.87 (0.81, 0.94)                     | 0.69 (0.61, 0.79)             |
| 6-8                             | 1.15 (0.96, 1.37)                                 | 1.14 (1.02, 1.27)                     | 0.82 (0.73, 0.92)                     | 0.74 (0.61, 0.91)             |
| 9 or more                       | 1.37 (1.02, 1.83)                                 | 1.40 (1.18, 1.66)                     | 0.81 (0.66, 0.99)                     | 0.58 (0.41, 0.83)             |

| Patient Characteristics | Model 2: 5-Level Multinomial Logistic Regression* |                                       |                                       |                               |
|-------------------------|---------------------------------------------------|---------------------------------------|---------------------------------------|-------------------------------|
|                         | OR (99% CI)<br>Major Decrease                     | OR (99% CI)<br>Mild/Moderate Decrease | OR (99% CI)<br>Mild/Moderate Increase | OR (99% CI)<br>Major Increase |
| Baseline comorbidities  |                                                   |                                       |                                       |                               |
| Prior AMI               | 1.14 (0.95, 1.38)                                 | 1.01 (0.90, 1.13)                     | 0.92 (0.81, 1.05)                     | 0.90 (0.72, 1.14)             |
| Dementia/Alz#           | 1.30 (1.15, 1.47)                                 | 1.08 (1.00, 1.17)                     | 1.06 (0.97, 1.15)                     | 0.97 (0.83, 1.14)             |
| Depression              | 1.14 (1.02, 1.28)                                 | 1.10 (1.03, 1.18)                     | 1.01 (0.94, 1.09)                     | 1.03 (0.91, 1.16)             |
| CABG                    | 1.24 (0.84, 1.83)                                 | 1.10 (0.87, 1.38)                     | 1.26 (0.99, 1.61)                     | 1.35 (0.85, 2.17)             |
| PTCA/stent              | 1.21 (1.02, 1.45)                                 | 1.09 (0.99, 1.21)                     | 0.86 (0.77, 0.96)                     | 0.79 (0.64, 0.97)             |
| Ischemic heart disease  | 1.07 (0.97, 1.18)                                 | 1.10 (1.04, 1.17)                     | 0.89 (0.84, 0.94)                     | 0.61 (0.56, 0.68)             |
| Unstable angina         | 1.01 (0.84, 1.22)                                 | 1.05 (0.94, 1.17)                     | 0.87 (0.77, 0.99)                     | 0.97 (0.78, 1.20)             |
| Lipid abnormalities     | 0.88 (0.77, 1.01)                                 | 1.04 (0.96, 1.13)                     | 1.08 (1.00, 1.18)                     | 1.07 (0.94, 1.23)             |
| Rhabdo/myopathy         | 1.15 (0.98, 1.35)                                 | 1.15 (1.04, 1.26)                     | 1.03 (0.94, 1.14)                     | 0.91 (0.77, 1.08)             |
| Concurrent medications  |                                                   |                                       |                                       |                               |
| Beta-blocker            | 0.83 (0.75, 0.91)                                 | 0.90 (0.85, 0.95)                     | 0.99 (0.94, 1.04)                     | 1.01 (0.92, 1.11)             |
| ACE inhibitor/ARB       | 0.88 (0.81, 0.97)                                 | 0.98 (0.93, 1.03)                     | 1.09 (1.04, 1.15)                     | 1.19 (1.09, 1.31)             |
| Index admission         |                                                   |                                       |                                       |                               |
| Subend infarction**     | 0.91 (0.82, 1.02)                                 | 0.99 (0.93, 1.06)                     | 0.92 (0.86, 0.98)                     | 0.81 (0.73, 0.90)             |
| CABG                    | 0.73 (0.59, 0.89)                                 | 0.80 (0.71, 0.91)                     | 1.28 (1.15, 1.43)                     | 1.77 (1.46, 2.14)             |
| PTCA/stent              | 0.80 (0.72, 0.89)                                 | 0.83 (0.78, 0.88)                     | 1.19 (1.12, 1.27)                     | 1.60 (1.43, 1.78)             |
| Platelet inhibitors     | 0.86 (0.68, 1.09)                                 | 0.92 (0.81, 1.05)                     | 1.01 (0.90, 1.13)                     | 0.95 (0.78, 1.16)             |
| Cardiac catheterization | 0.99 (0.84, 1.17)                                 | 1.04 (0.95, 1.15)                     | 1.07 (0.97, 1.17)                     | 1.20 (1.02, 1.41)             |
| Angiocardiology         | 0.87 (0.74, 1.02)                                 | 0.91 (0.83, 0.99)                     | 1.06 (0.97, 1.16)                     | 1.02 (0.87, 1.19)             |
| Cardiogenic shock       | 0.87 (0.64, 1.17)                                 | 1.10 (0.94, 1.30)                     | 1.14 (0.97, 1.34)                     | 1.21 (0.92, 1.60)             |
| Cardiac dysrhythmias    | 1.01 (0.92, 1.10)                                 | 0.99 (0.94, 1.05)                     | 0.93 (0.88, 0.98)                     | 0.90 (0.82, 0.99)             |
| Hypotension             | 1.01 (0.84, 1.22)                                 | 1.01 (0.90, 1.12)                     | 1.05 (0.94, 1.17)                     | 1.04 (0.86, 1.27)             |
| Acute renal failure     | 1.05 (0.94, 1.17)                                 | 1.05 (0.98, 1.13)                     | 1.00 (0.93, 1.07)                     | 0.99 (0.87, 1.13)             |
| Heart failure           | 1.08 (0.99, 1.18)                                 | 1.00 (0.95, 1.06)                     | 1.00 (0.95, 1.06)                     | 1.00 (0.91, 1.10)             |
| Length of stay (days)   |                                                   |                                       |                                       |                               |

| Model 2: 5-Level Multinomial Logistic Regression* |                   |                        |                        |                   |
|---------------------------------------------------|-------------------|------------------------|------------------------|-------------------|
| Patient Characteristics                           | OR (99% CI)       | OR (99% CI)            | OR (99% CI)            | OR (99% CI)       |
|                                                   | Major Decrease    | Mild/Moderate Decrease | Mild/Moderate Increase | Major Increase    |
| 1-3                                               | 1.                | 1.                     | 1.                     | 1.                |
| 4-6                                               | 1.11 (1.01, 1.23) | 1.04 (0.98, 1.10)      | 0.99 (0.93, 1.05)      | 1.04 (0.94, 1.16) |
| 7-11                                              | 1.36 (1.21, 1.53) | 1.08 (1.01, 1.17)      | 1.00 (0.93, 1.08)      | 1.10 (0.96, 1.25) |
| 12+                                               | 1.67 (1.42, 1.96) | 1.16 (1.05, 1.28)      | 1.07 (0.96, 1.19)      | 1.11 (0.91, 1.34) |
| Intensive care                                    |                   |                        |                        |                   |
| None                                              | 1.                | 1.                     | 1.                     | 1.                |
| CCU only                                          | 1.03 (0.91, 1.16) | 1.03 (0.96, 1.10)      | 1.02 (0.95, 1.09)      | 1.12 (0.98, 1.27) |
| ICU only                                          | 1.09 (0.98, 1.21) | 1.04 (0.98, 1.11)      | 1.00 (0.94, 1.06)      | 1.07 (0.95, 1.20) |
| Both                                              | 1.00 (0.85, 1.18) | 1.05 (0.96, 1.16)      | 1.02 (0.92, 1.12)      | 1.09 (0.93, 1.29) |
| Cardiologist consult                              | 0.95 (0.84, 1.08) | 0.95 (0.88, 1.02)      | 1.02 (0.94, 1.10)      | 1.14 (0.99, 1.31) |
| 30-day follow-up                                  |                   |                        |                        |                   |
| None                                              | 1.                | 1.                     | 1.                     | 1.                |
| PCP only††                                        | 1.01 (0.89, 1.15) | 0.96 (0.89, 1.03)      | 1.07 (0.99, 1.15)      | 1.10 (0.96, 1.27) |
| Cardiologist only                                 | 0.83 (0.72, 0.97) | 0.93 (0.85, 1.01)      | 1.13 (1.03, 1.23)      | 1.27 (1.09, 1.48) |
| Both                                              | 0.93 (0.82, 1.06) | 0.95 (0.89, 1.03)      | 1.16 (1.08, 1.26)      | 1.48 (1.29, 1.69) |

\*Five-level multinomial logistic regression model comparing all four outcomes in table to the reference group of no change in adherence. †Enrolled in Medicare and Medicaid. ‡Median household income of US Census block groups for individuals aged 65 and older. §CCI score does not include counts for AMI and dementia. ¶CCI definition. #Medicare Chronic Condition Data Warehouse definition. \*\*Diagnosis code for subendocardial infarction, compared to a transmural infarction. ††Primary care physician, physician assistant, or nurse practitioner. ‡‡Odds ratio for a 10% higher pre-AMI adherence (e.g. 50% compared to 40%). *Abbreviations:* AMI=acute myocardial infarction; OR=odds ratio; CI=confidence interval; PDC=proportion of days covered; CCI=Charlson Comorbidity Index; Alz=Alzheimer's disease; CABG=Coronary artery bypass surgery; PTCA=percutaneous transluminal coronary angioplasty; Rhabdo=rhabdomyolysis; ACE=angiotensin-converting enzyme; ARB=angiotensin II receptor blocker; subend=subendocardial; CCU=coronary care unit; ICU=intensive care unit; PCP=primary care provider.

**Table S6.** Crude estimates, fully adjusted model, and sensitivity analyses involving changing variable definitions or adding new variables to the model for the three-level multinomial regression model predicting statin adherence change after an AMI.

|                         |          | Crude estimates | Crude + pre-AMI PDC† | Fully adjusted model‡ | Adherence change conservative§ | 6-week follow-up¶ | Liver disease# | ADD change** | Statin intensity†† |
|-------------------------|----------|-----------------|----------------------|-----------------------|--------------------------------|-------------------|----------------|--------------|--------------------|
| Patient characteristics |          | OR [99% CLR]    |                      |                       |                                |                   |                |              |                    |
| Pre-AMI PDC (10%)‡‡     | Increase | 0.67 [1.01]     |                      | 0.67 [1.01]           | 0.67 [1.01]                    | 0.67 [1.01]       | 0.67 [1.01]    | 0.66 [1.02]* | 0.67 [1.01]        |
|                         | Decrease | 1.03 [1.02]     |                      | 1.04 [1.02]           | 1.05 [1.02]                    | 1.04 [1.02]       | 1.04 [1.02]    | 1.08 [1.02]* | 1.04 [1.02]        |
| Age                     |          |                 |                      |                       |                                |                   |                |              |                    |
| 66-75                   |          | 1.              | 1.                   | 1.                    | 1.                             | 1.                | 1.             | 1.           | 1.                 |
| 76-85                   | Increase | 0.87 [1.09]*    | 0.92 [1.11]          | 0.97 [1.11]           | 0.97 [1.11]                    | 0.97 [1.11]       | 0.97 [1.11]    | 0.98 [1.11]  | 0.98 [1.11]        |
|                         | Decrease | 1.05 [1.10]*    | 1.05 [1.10]*         | 0.99 [1.10]           | 0.99 [1.10]                    | 0.99 [1.10]       | 0.99 [1.10]    | 0.99 [1.10]  | 0.99 [1.10]        |
| 86+                     | Increase | 0.70 [1.13]*    | 0.75 [1.16]*         | 0.88 [1.17]           | 0.88 [1.17]                    | 0.88 [1.17]       | 0.88 [1.17]    | 0.90 [1.17]  | 0.89 [1.17]        |
|                         | Decrease | 1.12 [1.13]*    | 1.11 [1.13]*         | 0.99 [1.14]           | 0.98 [1.14]                    | 0.99 [1.14]       | 0.99 [1.14]    | 0.99 [1.14]  | 0.99 [1.14]        |
| Female                  | Increase | 1.08 [1.08]     | 1.06 [1.10]          | 1.06 [1.10]           | 1.06 [1.11]                    | 1.06 [1.10]       | 1.06 [1.10]    | 1.06 [1.11]  | 1.06 [1.10]        |
|                         | Decrease | 1.06 [1.09]     | 1.06 [1.09]          | 1.03 [1.09]           | 1.03 [1.10]                    | 1.03 [1.09]       | 1.03 [1.09]    | 1.03 [1.10]  | 1.03 [1.09]        |
| Race/ethnicity          |          |                 |                      |                       |                                |                   |                |              |                    |
| White                   |          | 1.              | 1.                   | 1.                    | 1.                             | 1.                | 1.             | 1.           | 1.                 |
| Black                   | Increase | 1.50 [1.14]*    | 1.15 [1.17]          | 1.14 [1.18]           | 1.12 [1.18]                    | 1.14 [1.18]       | 1.14 [1.18]    | 1.11 [1.18]  | 1.13 [1.18]        |
|                         | Decrease | 1.18 [1.16]     | 1.21 [1.16]          | 1.21 [1.17]           | 1.18 [1.17]                    | 1.21 [1.17]       | 1.21 [1.17]    | 1.22 [1.17]  | 1.21 [1.17]        |
| Hispanic                | Increase | 1.63 [1.24]*    | 1.39 [1.29]          | 1.29 [1.30]           | 1.30 [1.30]                    | 1.29 [1.30]       | 1.30 [1.30]    | 1.26 [1.31]  | 1.29 [1.30]        |
|                         | Decrease | 1.23 [1.28]     | 1.25 [1.28]          | 1.30 [1.29]           | 1.28 [1.30]                    | 1.31 [1.29]       | 1.30 [1.29]    | 1.32 [1.30]  | 1.31 [1.29]        |
| Asian                   | Increase | 1.18 [1.29]     | 1.30 [1.36]          | 1.16 [1.37]           | 1.18 [1.38]                    | 1.16 [1.37]       | 1.17 [1.37]    | 1.14 [1.38]  | 1.15 [1.38]        |
|                         | Decrease | 0.87 [1.36]     | 0.87 [1.36]          | 0.97 [1.37]           | 0.97 [1.38]                    | 0.97 [1.37]       | 0.97 [1.37]    | 0.98 [1.38]  | 0.97 [1.37]        |
| Other                   | Increase | 1.21 [1.32]     | 1.21 [1.39]          | 1.15 [1.39]           | 1.15 [1.40]                    | 1.15 [1.39]       | 1.15 [1.39]    | 1.11 [1.40]  | 1.14 [1.39]        |
|                         | Decrease | 1.15 [1.35]     | 1.15 [1.35]          | 1.22 [1.36]           | 1.22 [1.36]                    | 1.22 [1.36]       | 1.22 [1.36]    | 1.25 [1.36]  | 1.23 [1.36]        |
| Dual eligibility        | Increase | 1.12 [1.09]     | 1.18 [1.11]          | 1.18 [1.13]           | 1.19 [1.13]                    | 1.18 [1.13]       | 1.18 [1.13]    | 1.14 [1.13]  | 1.17 [1.13]        |
|                         | Decrease | 0.93 [1.10]*    | 0.93 [1.10]*         | 0.80 [1.12]           | 0.80 [1.12]                    | 0.80 [1.12]       | 0.80 [1.12]    | 0.81 [1.12]  | 0.80 [1.12]        |



|                             |          | Crude estimates | Crude + pre-AMI PDC† | Fully adjusted model‡ | Adherence change conservative§ | 6-week follow-up | Liver disease# | ADD change** | Statin intensity†† |
|-----------------------------|----------|-----------------|----------------------|-----------------------|--------------------------------|------------------|----------------|--------------|--------------------|
| Patient characteristics     |          | OR [99% CLR]    |                      |                       |                                |                  |                |              |                    |
| Household income            |          |                 |                      |                       |                                |                  |                |              |                    |
| ≤\$30,000                   |          | 1.              | 1.                   | 1.                    | 1.                             | 1.               | 1.             | 1.           | 1.                 |
| \$30,001-60,000             | Increase | 0.92 [1.09]*    | 0.96 [1.10]          | 0.98 [1.11]           | 0.99 [1.11]                    | 0.98 [1.11]      | 0.98 [1.11]    | 0.99 [1.11]  | 0.98 [1.11]        |
|                             | Decrease | 0.96 [1.09]     | 0.95 [1.09]          | 0.96 [1.10]           | 0.96 [1.10]                    | 0.96 [1.10]      | 0.96 [1.10]    | 0.96 [1.10]  | 0.96 [1.10]        |
| \$60,001-100,000            | Increase | 0.95 [1.15]     | 1.03 [1.18]          | 1.03 [1.18]           | 1.03 [1.19]                    | 1.03 [1.18]      | 1.03 [1.18]    | 1.01 [1.19]  | 1.03 [1.18]        |
|                             | Decrease | 0.96 [1.16]     | 0.95 [1.17]          | 0.96 [1.17]           | 0.96 [1.17]                    | 0.96 [1.17]      | 0.96 [1.17]    | 0.97 [1.17]  | 0.96 [1.17]        |
| \$100,001-150,000           | Increase | 0.90 [1.37]     | 1.04 [1.44]          | 1.05 [1.44]           | 1.06 [1.45]                    | 1.05 [1.44]      | 1.05 [1.44]    | 1.02 [1.45]  | 1.04 [1.44]        |
|                             | Decrease | 1.01 [1.38]     | 1.00 [1.38]          | 1.01 [1.39]           | 1.01 [1.39]                    | 1.01 [1.39]      | 1.01 [1.39]    | 1.03 [1.39]  | 1.01 [1.39]        |
| >\$150,000                  | Increase | 0.92 [1.71]     | 1.07 [1.87]          | 1.10 [1.88]           | 1.11 [1.90]                    | 1.10 [1.88]      | 1.10 [1.88]    | 1.07 [1.90]  | 1.08 [1.88]        |
|                             | Decrease | 0.80 [1.85]     | 0.80 [1.85]          | 0.79 [1.85]           | 0.78 [1.88]                    | 0.80 [1.85]      | 0.79 [1.85]    | 0.79 [1.87]  | 0.80 [1.85]        |
| Adjusted CCI§§              |          |                 |                      |                       |                                |                  |                |              |                    |
| 0                           |          | 1.              | 1.                   | 1.                    | 1.                             | 1.               | 1.             | 1.           | 1.                 |
| 1-2                         | Increase | 0.89 [1.11]     | 0.86 [1.13]          | 0.88 [1.14]           | 0.88 [1.14]                    | 0.88 [1.14]      | 0.88 [1.14]    | 0.90 [1.14]  | 0.88 [1.14]        |
|                             | Decrease | 1.08 [1.13]     | 1.08 [1.13]          | 1.03 [1.13]           | 1.03 [1.14]                    | 1.03 [1.13]      | 1.03 [1.13]    | 1.01 [1.13]  | 1.03 [1.13]        |
| 3-5                         | Increase | 0.81 [1.12]     | 0.76 [1.14]*         | 0.84 [1.16]           | 0.83 [1.16]                    | 0.84 [1.16]      | 0.85 [1.16]    | 0.87 [1.16]  | 0.85 [1.16]        |
|                             | Decrease | 1.21 [1.13]*    | 1.21 [1.13]*         | 1.08 [1.15]           | 1.07 [1.15]                    | 1.08 [1.15]      | 1.08 [1.15]    | 1.04 [1.15]  | 1.07 [1.15]        |
| 6-8                         | Increase | 0.78 [1.18]     | 0.70 [1.22]*         | 0.81 [1.24]           | 0.81 [1.25]                    | 0.81 [1.24]      | 0.81 [1.25]    | 0.87 [1.25]  | 0.82 [1.25]        |
|                             | Decrease | 1.36 [1.19]*    | 1.36 [1.19]*         | 1.14 [1.21]           | 1.14 [1.21]                    | 1.14 [1.21]      | 1.12 [1.21]    | 1.08 [1.21]  | 1.13 [1.21]        |
| 9 or more                   | Increase | 0.86 [1.37]     | 0.66 [1.45]          | 0.77 [1.47]           | 0.78 [1.47]                    | 0.77 [1.47]      | 0.81 [1.48]    | 0.83 [1.47]  | 0.78 [1.47]        |
|                             | Decrease | 1.63 [1.35]     | 1.64 [1.35]          | 1.39 [1.36]           | 1.40 [1.37]                    | 1.38 [1.36]      | 1.42 [1.37]    | 1.26 [1.37]  | 1.38 [1.36]        |
| Baseline comorbidities      |          |                 |                      |                       |                                |                  |                |              |                    |
| Prior AMI                   | Increase | 0.86 [1.22]     | 0.73 [1.26]*         | 0.92 [1.28]           | 0.93 [1.29]                    | 0.92 [1.28]      | 0.92 [1.28]    | 0.92 [1.29]  | 0.92 [1.28]        |
|                             | Decrease | 1.17 [1.21]*    | 1.18 [1.21]*         | 1.04 [1.23]           | 1.04 [1.23]                    | 1.04 [1.23]      | 1.04 [1.23]    | 1.02 [1.23]  | 1.04 [1.23]        |
| Dementia/<br>Alzheimer's### | Increase | 0.98 [1.14]     | 0.94 [1.17]*         | 1.05 [1.18]           | 1.06 [1.18]                    | 1.05 [1.18]      | 1.05 [1.18]    | 1.06 [1.18]  | 1.05 [1.18]        |
|                             | Decrease | 1.25 [1.14]*    | 1.26 [1.14]*         | 1.13 [1.15]           | 1.13 [1.15]                    | 1.13 [1.15]      | 1.13 [1.15]    | 1.13 [1.15]  | 1.13 [1.15]        |
| Depression                  | Increase | 1.02 [1.12]     | 0.98 [1.14]          | 1.02 [1.14]           | 1.02 [1.15]                    | 1.02 [1.14]      | 1.02 [1.14]    | 1.01 [1.15]  | 1.02 [1.15]        |
|                             | Decrease | 1.18 [1.12]     | 1.19 [1.12]          | 1.11 [1.13]           | 1.11 [1.13]                    | 1.11 [1.13]      | 1.11 [1.13]    | 1.12 [1.13]  | 1.11 [1.13]        |

|                           |          | Crude estimates | Crude + pre-AMI PDC† | Fully adjusted model‡ | Adherence change conservative§ | 6-week follow-up¶ | Liver disease# | ADD change** | Statin intensity†† |
|---------------------------|----------|-----------------|----------------------|-----------------------|--------------------------------|-------------------|----------------|--------------|--------------------|
| Patient characteristics   |          | OR [99% CLR]    |                      |                       |                                |                   |                |              |                    |
| CABG                      | Increase | 1.01 [1.49]     | 1.11 [1.59]          | 1.28 [1.61]           | 1.28 [1.62]                    | 1.27 [1.61]       | 1.28 [1.61]    | 1.26 [1.61]  | 1.29 [1.61]        |
|                           | Decrease | 1.15 [1.50]     | 1.15 [1.50]          | 1.13 [1.52]           | 1.13 [1.53]                    | 1.13 [1.52]       | 1.13 [1.52]    | 1.14 [1.53]  | 1.13 [1.52]        |
| PTCA/stent                | Increase | 0.87 [1.18]     | 0.78 [1.21]          | 0.85 [1.24]           | 0.84 [1.25]                    | 0.85 [1.24]       | 0.85 [1.24]    | 0.88 [1.24]  | 0.85 [1.24]        |
|                           | Decrease | 1.10 [1.18]     | 1.11 [1.18]          | 1.12 [1.20]           | 1.14 [1.21]                    | 1.12 [1.20]       | 1.12 [1.20]    | 1.10 [1.21]  | 1.11 [1.20]        |
| Ischemic heart disease    | Increase | 0.78 [1.08]*    | 0.76 [1.10]*         | 0.84 [1.11]           | 0.83 [1.12]                    | 0.84 [1.11]       | 0.84 [1.11]    | 0.90 [1.12]* | 0.84 [1.12]        |
|                           | Decrease | 1.12 [1.09]     | 1.13 [1.09]          | 1.09 [1.11]           | 1.09 [1.11]                    | 1.10 [1.11]       | 1.09 [1.11]    | 1.04 [1.11]  | 1.08 [1.11]        |
| Unstable angina           | Increase | 0.84 [1.20]     | 0.77 [1.24]*         | 0.89 [1.26]           | 0.89 [1.27]                    | 0.89 [1.26]       | 0.89 [1.26]    | 0.89 [1.27]  | 0.89 [1.26]        |
|                           | Decrease | 1.10 [1.20]     | 1.11 [1.20]          | 1.04 [1.22]           | 1.05 [1.22]                    | 1.04 [1.22]       | 1.04 [1.22]    | 1.04 [1.22]  | 1.04 [1.22]        |
| Lipid abnormalities       | Increase | 0.91 [1.13]*    | 1.03 [1.16]          | 1.07 [1.17]           | 1.07 [1.17]                    | 1.07 [1.17]       | 1.07 [1.17]    | 1.08 [1.17]  | 1.07 [1.17]        |
|                           | Decrease | 1.02 [1.15]     | 1.01 [1.15]          | 1.00 [1.16]           | 0.99 [1.16]                    | 1.00 [1.16]       | 1.00 [1.16]    | 1.00 [1.16]  | 0.99 [1.16]        |
| Rhabdomyolysis/myopathy   | Increase | 1.13 [1.17]*    | 0.96 [1.20]          | 1.01 [1.21]           | 1.01 [1.21]                    | 1.01 [1.21]       | 1.01 [1.21]    | 1.01 [1.21]  | 1.01 [1.21]        |
|                           | Decrease | 1.22 [1.18]     | 1.24 [1.18]          | 1.15 [1.18]           | 1.16 [1.18]                    | 1.15 [1.18]       | 1.14 [1.18]    | 1.14 [1.18]  | 1.14 [1.18]        |
| Concurrent medications    |          |                 |                      |                       |                                |                   |                |              |                    |
| Beta-blocker              | Increase | 0.74 [1.08]*    | 0.88 [1.10]*         | 0.99 [1.11]           | 0.99 [1.11]                    | 0.99 [1.11]       | 0.99 [1.11]    | 1.01 [1.11]  | 0.99 [1.11]        |
|                           | Decrease | 0.96 [1.09]*    | 0.95 [1.09]*         | 0.88 [1.10]           | 0.88 [1.10]                    | 0.88 [1.10]       | 0.88 [1.10]    | 0.87 [1.10]  | 0.88 [1.10]        |
| ACE inhibitor/ARB         | Increase | 0.86 [1.09]*    | 1.07 [1.10]          | 1.10 [1.11]           | 1.10 [1.11]                    | 1.10 [1.11]       | 1.10 [1.11]    | 1.11 [1.11]  | 1.10 [1.11]        |
|                           | Decrease | 0.98 [1.09]     | 0.98 [1.09]          | 0.95 [1.10]           | 0.95 [1.10]                    | 0.95 [1.10]       | 0.95 [1.10]    | 0.95 [1.10]  | 0.95 [1.10]        |
| Index admission           |          |                 |                      |                       |                                |                   |                |              |                    |
| Subendocardial infarction | Increase | 0.79 [1.10]*    | 0.79 [1.12]*         | 0.90 [1.13]           | 0.90 [1.13]                    | 0.90 [1.13]       | 0.90 [1.13]    | 0.93 [1.13]  | 0.91 [1.13]        |
|                           | Decrease | 1.07 [1.12]*    | 1.07 [1.11]*         | 0.97 [1.12]           | 0.97 [1.12]                    | 0.97 [1.12]       | 0.97 [1.12]    | 0.96 [1.12]  | 0.97 [1.12]        |
| CABG                      | Increase | 1.30 [1.17]     | 1.40 [1.20]          | 1.34 [1.24]           | 1.36 [1.24]                    | 1.33 [1.24]       | 1.34 [1.24]    | 1.34 [1.24]  | 1.35 [1.24]        |
|                           | Decrease | 0.88 [1.21]*    | 0.88 [1.21]*         | 0.78 [1.24]           | 0.77 [1.24]                    | 0.79 [1.24]       | 0.78 [1.24]    | 0.80 [1.24]  | 0.78 [1.24]        |
| PTCA/stent                | Increase | 1.32 [1.08]     | 1.36 [1.10]*         | 1.25 [1.13]           | 1.26 [1.13]                    | 1.24 [1.13]       | 1.25 [1.13]    | 1.15 [1.13]* | 1.22 [1.13]        |
|                           | Decrease | 0.76 [1.10]*    | 0.76 [1.10]*         | 0.82 [1.12]           | 0.82 [1.12]                    | 0.83 [1.12]       | 0.82 [1.12]    | 0.87 [1.12]  | 0.83 [1.12]        |
| Platelet inhibitors       | Increase | 1.14 [1.20]*    | 1.12 [1.24]          | 1.00 [1.25]           | 0.99 [1.25]                    | 1.00 [1.25]       | 1.00 [1.25]    | 0.97 [1.26]  | 1.00 [1.25]        |
|                           | Decrease | 0.81 [1.25]     | 0.81 [1.25]          | 0.91 [1.26]           | 0.90 [1.26]                    | 0.91 [1.26]       | 0.91 [1.26]    | 0.93 [1.26]  | 0.91 [1.26]        |

|                         |          | Crude estimates | Crude + pre-AMI PDC† | Fully adjusted model‡ | Adherence change conservative§ | 6-week follow-up¶ | Liver disease# | ADD change** | Statin intensity†† |
|-------------------------|----------|-----------------|----------------------|-----------------------|--------------------------------|-------------------|----------------|--------------|--------------------|
| Patient characteristics |          | OR [99% CLR]    |                      |                       |                                |                   |                |              |                    |
| Cardiac catheterization | Increase | 1.35 [1.09]*    | 1.38 [1.10]*         | 1.09 [1.19]           | 1.09 [1.19]                    | 1.09 [1.19]       | 1.09 [1.19]    | 1.08 [1.19]  | 1.09 [1.19]        |
|                         | Decrease | 0.81 [1.09]*    | 0.81 [1.09]*         | 1.03 [1.19]           | 1.03 [1.19]                    | 1.03 [1.19]       | 1.03 [1.19]    | 1.04 [1.19]  | 1.03 [1.19]        |
| Angiocardiology         | Increase | 1.29 [1.08]*    | 1.34 [1.10]*         | 1.05 [1.19]           | 1.06 [1.19]                    | 1.05 [1.19]       | 1.05 [1.19]    | 1.04 [1.19]  | 1.05 [1.19]        |
|                         | Decrease | 0.79 [1.09]*    | 0.79 [1.09]*         | 0.90 [1.18]           | 0.88 [1.18]                    | 0.90 [1.18]       | 0.90 [1.18]    | 0.91 [1.19]  | 0.90 [1.18]        |
| Cardiogenic shock       | Increase | 1.26 [1.29]     | 1.37 [1.35]*         | 1.14 [1.36]           | 1.14 [1.37]                    | 1.14 [1.36]       | 1.14 [1.36]    | 1.13 [1.37]  | 1.14 [1.36]        |
|                         | Decrease | 1.06 [1.34]     | 1.05 [1.34]          | 1.04 [1.35]           | 1.03 [1.36]                    | 1.04 [1.35]       | 1.04 [1.35]    | 1.05 [1.36]  | 1.04 [1.35]        |
| Cardiac dysrhythmias    | Increase | 0.90 [1.09]     | 0.91 [1.11]          | 0.93 [1.11]           | 0.93 [1.11]                    | 0.93 [1.11]       | 0.93 [1.11]    | 0.94 [1.11]  | 0.93 [1.11]        |
|                         | Decrease | 1.00 [1.10]     | 1.00 [1.10]          | 1.00 [1.10]           | 1.00 [1.10]                    | 1.00 [1.10]       | 1.00 [1.10]    | 0.98 [1.10]  | 0.99 [1.10]        |
| Hypotension             | Increase | 1.02 [1.20]     | 1.07 [1.24]          | 1.05 [1.24]           | 1.07 [1.24]                    | 1.05 [1.24]       | 1.05 [1.24]    | 1.04 [1.24]  | 1.04 [1.24]        |
|                         | Decrease | 1.03 [1.21]     | 1.02 [1.21]          | 1.01 [1.22]           | 1.01 [1.22]                    | 1.01 [1.22]       | 1.01 [1.22]    | 1.00 [1.22]  | 1.01 [1.22]        |
| Acute renal failure     | Increase | 0.95 [1.12]     | 0.97 [1.14]          | 1.00 [1.15]           | 1.01 [1.15]                    | 1.00 [1.15]       | 1.00 [1.15]    | 1.00 [1.15]  | 1.00 [1.15]        |
|                         | Decrease | 1.17 [1.12]*    | 1.17 [1.12]*         | 1.05 [1.13]           | 1.06 [1.13]                    | 1.05 [1.13]       | 1.05 [1.13]    | 1.04 [1.13]  | 1.05 [1.13]        |
| Heart failure           | Increase | 0.89 [1.09]*    | 0.90 [1.10]*         | 1.00 [1.11]           | 1.01 [1.11]                    | 1.00 [1.11]       | 1.00 [1.11]    | 1.02 [1.11]  | 1.01 [1.11]        |
|                         | Decrease | 1.13 [1.09]*    | 1.13 [1.09]*         | 1.02 [1.10]           | 1.03 [1.10]                    | 1.02 [1.10]       | 1.02 [1.10]    | 1.00 [1.10]  | 1.02 [1.10]        |
| Length of stay (days)   |          |                 |                      |                       |                                |                   |                |              |                    |
| 1-3                     |          | 1.              | 1.                   | 1.                    | 1.                             | 1.                | 1.             | 1.           | 1.                 |
| 4-6                     | Increase | 0.97 [1.10]     | 0.96 [1.11]          | 1.00 [1.12]           | 0.99 [1.12]                    | 1.00 [1.12]       | 1.00 [1.12]    | 1.00 [1.12]  | 1.00 [1.12]        |
|                         | Decrease | 1.12 [1.11]*    | 1.12 [1.11]*         | 1.05 [1.11]           | 1.06 [1.11]                    | 1.05 [1.11]       | 1.05 [1.11]    | 1.05 [1.11]  | 1.05 [1.11]        |
| 7-11                    | Increase | 0.98 [1.12]     | 1.00 [1.14]          | 1.02 [1.16]           | 1.02 [1.16]                    | 1.02 [1.16]       | 1.02 [1.16]    | 1.03 [1.16]  | 1.03 [1.16]        |
|                         | Decrease | 1.23 [1.13]*    | 1.22 [1.13]          | 1.14 [1.14]           | 1.15 [1.14]                    | 1.14 [1.14]       | 1.14 [1.14]    | 1.13 [1.14]  | 1.14 [1.14]        |
| 12+                     | Increase | 1.11 [1.17]     | 1.12 [1.20]          | 1.08 [1.23]           | 1.08 [1.23]                    | 1.08 [1.23]       | 1.08 [1.23]    | 1.09 [1.23]  | 1.08 [1.23]        |
|                         | Decrease | 1.34 [1.17]     | 1.34 [1.17]          | 1.27 [1.20]           | 1.28 [1.20]                    | 1.26 [1.20]       | 1.27 [1.20]    | 1.23 [1.20]  | 1.27 [1.20]        |

|                                        |          | Crude estimates | Crude + pre-AMI PDC† | Fully adjusted model‡ | Adherence change conservative§ | 6-week follow-up¶ | Liver disease# | ADD change** | Statin intensity†† |
|----------------------------------------|----------|-----------------|----------------------|-----------------------|--------------------------------|-------------------|----------------|--------------|--------------------|
| Patient characteristics                |          | OR [99% CLR]    |                      |                       |                                |                   |                |              |                    |
| Intensive care                         |          |                 |                      |                       |                                |                   |                |              |                    |
| None                                   |          | 1.              | 1.                   | 1.                    | 1.                             | 1.                | 1.             | 1.           | 1.                 |
| Coronary care unit only                | Increase | 1.17 [1.12]*    | 1.16 [1.14]*         | 1.03 [1.15]           | 1.03 [1.15]                    | 1.03 [1.15]       | 1.03 [1.15]    | 1.02 [1.15]  | 1.03 [1.15]        |
|                                        | Decrease | 0.98 [1.13]     | 0.98 [1.13]          | 1.03 [1.13]           | 1.03 [1.14]                    | 1.03 [1.13]       | 1.03 [1.13]    | 1.04 [1.14]  | 1.03 [1.13]        |
| Intensive care unit only               | Increase | 1.10 [1.11]*    | 1.10 [1.13]*         | 1.01 [1.13]           | 1.01 [1.13]                    | 1.01 [1.13]       | 1.01 [1.13]    | 1.01 [1.13]  | 1.01 [1.13]        |
|                                        | Decrease | 1.04 [1.11]     | 1.04 [1.11]          | 1.05 [1.12]           | 1.05 [1.12]                    | 1.06 [1.12]       | 1.05 [1.12]    | 1.05 [1.12]  | 1.05 [1.12]        |
| Both                                   | Increase | 1.25 [1.15]*    | 1.26 [1.18]*         | 1.03 [1.20]           | 1.02 [1.20]                    | 1.03 [1.20]       | 1.03 [1.20]    | 1.01 [1.20]  | 1.02 [1.20]        |
|                                        | Decrease | 1.01 [1.17]     | 1.01 [1.17]          | 1.04 [1.18]           | 1.04 [1.18]                    | 1.04 [1.18]       | 1.04 [1.18]    | 1.04 [1.19]  | 1.04 [1.18]        |
| Cardiologist consult                   | Increase | 1.12 [1.13]     | 1.15 [1.15]*         | 1.04 [1.16]           | 1.04 [1.16]                    | 1.03 [1.16]       | 1.04 [1.16]    | 1.02 [1.16]  | 1.03 [1.16]        |
|                                        | Decrease | 0.91 [1.13]     | 0.91 [1.13]          | 0.95 [1.14]           | 0.94 [1.14]                    | 0.96 [1.14]       | 0.95 [1.14]    | 0.96 [1.14]  | 0.95 [1.14]        |
| 30-day follow-up                       |          |                 |                      |                       |                                |                   |                |              |                    |
| None                                   |          | 1.              | 1.                   | 1.                    | 1.                             | 1.                | 1.             | 1.           | 1.                 |
| Primary care provider only***          | Increase | 0.96 [1.14]*    | 1.04 [1.16]          | 1.08 [1.16]           | 1.10 [1.17]                    | 1.08 [1.19]       | 1.08 [1.16]    | 1.06 [1.17]  | 1.07 [1.16]        |
|                                        | Decrease | 1.01 [1.14]     | 1.00 [1.14]          | 0.97 [1.14]           | 0.97 [1.15]                    | 0.97 [1.16]       | 0.97 [1.14]    | 0.98 [1.15]  | 0.97 [1.14]        |
| Cardiologist only                      | Increase | 1.05 [1.15]*    | 1.20 [1.17]          | 1.15 [1.18]           | 1.18 [1.19]                    | 1.16 [1.21]       | 1.15 [1.18]    | 1.10 [1.18]  | 1.14 [1.18]        |
|                                        | Decrease | 0.86 [1.16]     | 0.85 [1.16]          | 0.91 [1.17]           | 0.91 [1.17]                    | 0.86 [1.19]       | 0.91 [1.17]    | 0.94 [1.17]  | 0.92 [1.17]        |
| Both                                   | Increase | 1.03 [1.13]*    | 1.22 [1.15]          | 1.21 [1.16]           | 1.25 [1.16]                    | 1.24 [1.18]       | 1.21 [1.16]    | 1.17 [1.16]  | 1.20 [1.16]        |
|                                        | Decrease | 0.95 [1.14]     | 0.94 [1.14]          | 0.95 [1.14]           | 0.95 [1.14]                    | 0.92 [1.16]       | 0.95 [1.14]    | 0.97 [1.14]  | 0.96 [1.14]        |
| Mild liver disease¶¶                   | Increase |                 |                      |                       |                                |                   | 1.00 [1.43]    |              |                    |
|                                        | Decrease |                 |                      |                       |                                |                   | 1.19 [1.36]    |              |                    |
| Moderate/sever liver disease¶¶¶        | Increase |                 |                      |                       |                                |                   | 0.47 [3.42]    |              |                    |
|                                        | Decrease |                 |                      |                       |                                |                   | 1.10 [2.49]    |              |                    |
| Change in simvastatin-equivalent ADD** | Increase |                 |                      |                       |                                |                   |                | 1.01 [1.00]  |                    |
|                                        | Decrease |                 |                      |                       |                                |                   |                | 0.99 [1.00]  |                    |

|                             |          | Crude estimates | Crude + pre-AMI PDC† | Fully adjusted model‡ | Adherence change conservative§ | 6-week follow-up | Liver disease# | ADD change** | Statin intensity†† |
|-----------------------------|----------|-----------------|----------------------|-----------------------|--------------------------------|------------------|----------------|--------------|--------------------|
| Patient characteristics     |          |                 |                      |                       | OR [99% CLR]                   |                  |                |              |                    |
| Pre-AMI statin intensity††  |          |                 |                      |                       |                                |                  |                |              |                    |
| Low                         | Increase |                 |                      |                       |                                |                  |                |              | 1.08 [1.22]        |
|                             | Decrease |                 |                      |                       |                                |                  |                |              | 0.79 [1.25]        |
| Moderate                    |          |                 |                      |                       |                                |                  |                |              | 1.                 |
| High                        | Increase |                 |                      |                       |                                |                  |                |              | 0.80 [1.17]        |
|                             | Decrease |                 |                      |                       |                                |                  |                |              | 1.32 [1.18]        |
| Post-AMI statin intensity†† |          |                 |                      |                       |                                |                  |                |              |                    |
| Low                         | Increase |                 |                      |                       |                                |                  |                |              | 0.79 [1.26]        |
|                             | Decrease |                 |                      |                       |                                |                  |                |              | 1.32 [1.27]        |
| Moderate                    |          |                 |                      |                       |                                |                  |                |              | 1.                 |
| High                        | Increase |                 |                      |                       |                                |                  |                |              | 1.33 [1.15]        |
|                             | Decrease |                 |                      |                       |                                |                  |                |              | 0.77 [1.17]        |

All eight models are using the three-level multinomial logistic regression comparing decrease in adherence to no change and comparing increase in adherence to no change. \*Point estimate does not fall within the 99% confidence interval for the original full model (Model 1 from Table 2 in the main manuscript). †Estimates are only adjusted for pre-AMI adherence. ‡Fully adjusted model (Model 1 from Table 2 in the main manuscript). §This model required categorical changes in statin adherence to be at least a 10% absolute difference from pre- to post-AMI PDC (e.g. a pre-AMI PDC of 78% to post-AMI PDC of 84% would not be considered an adherence increase in this sensitivity analysis). ||The period for post-AMI follow-up with clinicians was extended to 42 days (6 weeks). #CCI measures of liver disease were added as separate variables to the model and the CCI score was further adjusted by not including mild and moderate/severe liver disease. \*\*Weighted average of the simvastatin-equivalent average daily dose in the post-AMI period minus the weighted average of the simvastatin-equivalent average daily dose in the pre-AMI period. Dose equivalency calculations were made as follows: fluvastatin, pravastatin, and lovastatin doses in mg were divided by 4, 2, and 2, respectively; atorvastatin, rosuvastatin, and pitavastatin doses in mg were multiplied by 2, 4, and 10, respectively. ††Statin intensity was measured using the LAST statin prescription claim filled BEFORE the index AMI hospitalization and using the FIRST claim filled AFTER the index hospitalization discharge. Statin intensity was measured according to the 2013 American College of Cardiology/ American Heart Association Guideline on the Treatment of Blood Cholesterol to Reduce Atherosclerotic Cardiovascular Risk in Adults. ‡‡Odds ratio for a 10% higher pre-AMI adherence (e.g. 50% compared to 40%). §§CCI score does not include counts for AMI and dementia; in the liver disease sensitivity analysis, it also does not include those measures. ||CCI definition. ##Medicare Chronic Condition Data Warehouse definition. \*\*\*Primary care physician, physician assistant, or nurse practitioner. *Abbreviations:* AMI=acute myocardial infarction; PDC=proportion of days covered; ADD=average daily dose; OR=odds ratio; CLR=confidence limit ratio (upper 99% confidence limit divided by the lower limit); CCI=Charlson Comorbidity Index; CABG=Coronary artery bypass surgery; PTCA=percutaneous transluminal coronary angioplasty; ACE=angiotensin-converting enzyme; ARB=angiotensin II receptor blocker.

**Table S7.** Fully adjusted model and sensitivity analyses with restricted cohort eligibility for the three-level multinomial regression model predicting statin adherence change after an AMI.

|                         |          | Fully<br>adjusted<br>model* | Prevalent<br>statin users† | Post-AMI<br>6-month<br>survival‡ | No AMI 6-<br>month post-<br>AMI§ |
|-------------------------|----------|-----------------------------|----------------------------|----------------------------------|----------------------------------|
|                         |          | N=113,296                   | N=101,905                  | N=101,015                        | N=104,572                        |
| Patient characteristics |          | OR [99% CLR]                |                            |                                  |                                  |
| Pre-AMI PDC (10%)       | Increase | 0.67 [1.01]                 | 0.68 [1.02]                | 0.67 [1.02]                      | 0.67 [1.02]                      |
|                         | Decrease | 1.04 [1.02]                 | 1.04 [1.02]                | 1.05 [1.02]                      | 1.04 [1.02]                      |
| Age                     |          |                             |                            |                                  |                                  |
| 66-75                   |          | 1.                          | 1.                         | 1.                               | 1.                               |
| 76-85                   | Increase | 0.97 [1.11]                 | 0.97 [1.11]                | 0.97 [1.12]                      | 0.98 [1.11]                      |
|                         | Decrease | 0.99 [1.10]                 | 0.99 [1.11]                | 0.99 [1.11]                      | 0.99 [1.11]                      |
| 86+                     | Increase | 0.88 [1.17]                 | 0.87 [1.18]                | 0.89 [1.18]                      | 0.89 [1.18]                      |
|                         | Decrease | 0.99 [1.14]                 | 1.01 [1.16]                | 0.98 [1.16]                      | 0.99 [1.15]                      |
| Female                  | Increase | 1.06 [1.10]                 | 1.06 [1.11]                | 1.08 [1.11]                      | 1.07 [1.11]                      |
|                         | Decrease | 1.03 [1.09]                 | 1.03 [1.10]                | 1.03 [1.10]                      | 1.03 [1.10]                      |
| Race/ethnicity          |          |                             |                            |                                  |                                  |
| White                   |          | 1.                          | 1.                         | 1.                               | 1.                               |
| Black                   | Increase | 1.14 [1.18]                 | 1.15 [1.19]                | 1.13 [1.19]                      | 1.12 [1.19]                      |
|                         | Decrease | 1.21 [1.17]                 | 1.19 [1.19]                | 1.22 [1.19]                      | 1.22 [1.18]                      |
| Hispanic                | Increase | 1.29 [1.30]                 | 1.30 [1.32]                | 1.30 [1.32]                      | 1.32 [1.32]                      |
|                         | Decrease | 1.30 [1.29]                 | 1.27 [1.33]                | 1.36 [1.32]                      | 1.37 [1.31]                      |
| Asian                   | Increase | 1.16 [1.37]                 | 1.16 [1.39]                | 1.14 [1.40]                      | 1.14 [1.39]                      |
|                         | Decrease | 0.97 [1.37]                 | 0.99 [1.40]                | 0.98 [1.40]                      | 0.97 [1.40]                      |
| Other                   | Increase | 1.15 [1.39]                 | 1.16 [1.42]                | 1.12 [1.42]                      | 1.13 [1.41]                      |
|                         | Decrease | 1.22 [1.36]                 | 1.19 [1.40]                | 1.22 [1.38]                      | 1.25 [1.37]                      |
| Dual eligibility        | Increase | 1.18 [1.13]                 | 1.18 [1.13]                | 1.20 [1.14]                      | 1.20 [1.13]                      |
|                         | Decrease | 0.80 [1.12]                 | 0.81 [1.13]                | 0.80 [1.13]                      | 0.80 [1.13]                      |
| Household income        |          |                             |                            |                                  |                                  |
| ≤\$30,000               |          | 1.                          | 1.                         | 1.                               | 1.                               |
| \$30,001-60,000         | Increase | 0.98 [1.11]                 | 1.00 [1.11]                | 0.98 [1.11]                      | 0.99 [1.11]                      |
|                         | Decrease | 0.96 [1.10]                 | 0.96 [1.11]                | 0.96 [1.10]                      | 0.96 [1.10]                      |
| \$60,001-100,000        | Increase | 1.03 [1.18]                 | 1.05 [1.19]                | 1.03 [1.20]                      | 1.04 [1.19]                      |
|                         | Decrease | 0.96 [1.17]                 | 0.96 [1.18]                | 0.96 [1.18]                      | 0.97 [1.17]                      |
| \$100,001-150,000       | Increase | 1.05 [1.44]                 | 1.05 [1.47]                | 1.07 [1.47]                      | 1.03 [1.46]                      |
|                         | Decrease | 1.01 [1.39]                 | 1.03 [1.42]                | 1.00 [1.42]                      | 0.98 [1.40]                      |
| >\$150,000              | Increase | 1.10 [1.88]                 | 1.15 [1.94]                | 1.27 [1.93]                      | 1.08 [1.93]                      |
|                         | Decrease | 0.79 [1.85]                 | 0.81 [1.96]                | 0.82 [1.95]                      | 0.82 [1.89]                      |

|                              |          | Fully<br>adjusted<br>model* | Prevalent<br>statin users† | Post-AMI<br>6-month<br>survival‡ | No AMI 6-<br>month post-<br>AMI§ |
|------------------------------|----------|-----------------------------|----------------------------|----------------------------------|----------------------------------|
|                              |          | N=113,296                   | N=101,905                  | N=101,015                        | N=104,572                        |
| Patient characteristics      |          | OR [99% CLR]                |                            |                                  |                                  |
| Adjusted CCI#                |          |                             |                            |                                  |                                  |
| 0                            |          | 1.                          | 1.                         | 1.                               | 1.                               |
| 1-2                          | Increase | 0.88 [1.14]                 | 0.89 [1.14]                | 0.88 [1.14]                      | 0.88 [1.14]                      |
|                              | Decrease | 1.03 [1.13]                 | 1.02 [1.15]                | 1.03 [1.14]                      | 1.03 [1.14]                      |
| 3-5                          | Increase | 0.84 [1.16]                 | 0.87 [1.16]                | 0.85 [1.16]                      | 0.85 [1.16]                      |
|                              | Decrease | 1.08 [1.15]                 | 1.07 [1.16]                | 1.09 [1.16]                      | 1.08 [1.15]                      |
| 6-8                          | Increase | 0.81 [1.24]                 | 0.84 [1.26]                | 0.79 [1.27]                      | 0.81 [1.26]                      |
|                              | Decrease | 1.14 [1.21]                 | 1.15 [1.23]                | 1.12 [1.23]                      | 1.11 [1.22]                      |
| 9 or more                    | Increase | 0.77 [1.47]                 | 0.77 [1.49]                | 0.82 [1.59]                      | 0.75 [1.50]                      |
|                              | Decrease | 1.39 [1.36]                 | 1.45 [1.40]                | 1.21 [1.48]                      | 1.44 [1.38]                      |
| Baseline comorbidities       |          |                             |                            |                                  |                                  |
| Prior AMI**                  | Increase | 0.92 [1.28]                 | 0.91 [1.31]                | 0.96 [1.32]                      | 0.90 [1.32]                      |
|                              | Decrease | 1.04 [1.23]                 | 0.99 [1.26]                | 1.07 [1.26]                      | 1.01 [1.26]                      |
| Dementia/Alzheimer's††       | Increase | 1.05 [1.18]                 | 1.02 [1.19]                | 1.05 [1.20]                      | 1.05 [1.19]                      |
|                              | Decrease | 1.13 [1.15]                 | 1.17 [1.16]                | 1.13 [1.17]                      | 1.12 [1.16]                      |
| Depression                   | Increase | 1.02 [1.14]                 | 1.03 [1.15]                | 1.00 [1.16]                      | 1.01 [1.15]                      |
|                              | Decrease | 1.11 [1.13]                 | 1.13 [1.14]                | 1.12 [1.14]                      | 1.12 [1.13]                      |
| CABG                         | Increase | 1.28 [1.61]                 | 1.35 [1.69]                | 1.30 [1.63]                      | 1.29 [1.64]                      |
|                              | Decrease | 1.13 [1.52]                 | 1.15 [1.65]                | 1.16 [1.54]                      | 1.14 [1.54]                      |
| PTCA/stent                   | Increase | 0.85 [1.24]                 | 0.86 [1.26]                | 0.84 [1.26]                      | 0.85 [1.26]                      |
|                              | Decrease | 1.12 [1.20]                 | 1.12 [1.23]                | 1.12 [1.22]                      | 1.14 [1.22]                      |
| Ischemic heart disease       | Increase | 0.84 [1.11]                 | 0.85 [1.12]                | 0.83 [1.12]                      | 0.84 [1.12]                      |
|                              | Decrease | 1.09 [1.11]                 | 1.07 [1.12]                | 1.12 [1.11]                      | 1.10 [1.11]                      |
| Unstable angina              | Increase | 0.89 [1.26]                 | 0.89 [1.28]                | 0.89 [1.28]                      | 0.89 [1.28]                      |
|                              | Decrease | 1.04 [1.22]                 | 0.99 [1.25]                | 1.02 [1.24]                      | 1.04 [1.23]                      |
| Lipid abnormalities          | Increase | 1.07 [1.17]                 | 1.06 [1.18]                | 1.06 [1.18]                      | 1.06 [1.18]                      |
|                              | Decrease | 1.00 [1.16]                 | 1.03 [1.17]                | 0.99 [1.17]                      | 0.98 [1.16]                      |
| Rhabdomyolysis/<br>myopathy  | Increase | 1.01 [1.21]                 | 1.01 [1.22]                | 0.98 [1.22]                      | 1.03 [1.22]                      |
|                              | Decrease | 1.15 [1.18]                 | 1.15 [1.20]                | 1.15 [1.20]                      | 1.16 [1.19]                      |
| Concurrent medications       |          |                             |                            |                                  |                                  |
| Beta-blocker                 | Increase | 0.99 [1.11]                 | 1.00 [1.11]                | 0.98 [1.12]                      | 0.98 [1.11]                      |
|                              | Decrease | 0.88 [1.10]                 | 0.91 [1.11]                | 0.87 [1.11]                      | 0.88 [1.10]                      |
| ACE inhibitor/ARB            | Increase | 1.10 [1.11]                 | 1.10 [1.11]                | 1.09 [1.11]                      | 1.10 [1.11]                      |
|                              | Decrease | 0.95 [1.10]                 | 0.96 [1.11]                | 0.95 [1.10]                      | 0.97 [1.10]                      |
| Index admission              |          |                             |                            |                                  |                                  |
| Subendocardial<br>infarction | Increase | 0.90 [1.13]                 | 0.91 [1.13]                | 0.90 [1.13]                      | 0.92 [1.13]                      |
|                              | Decrease | 0.97 [1.12]                 | 0.96 [1.13]                | 0.97 [1.13]                      | 0.97 [1.13]                      |

|                             |          | Fully<br>adjusted<br>model* | Prevalent<br>statin users† | Post-AMI<br>6-month<br>survival‡ | No AMI 6-<br>month post-<br>AMI§ |
|-----------------------------|----------|-----------------------------|----------------------------|----------------------------------|----------------------------------|
|                             |          | N=113,296                   | N=101,905                  | N=101,015                        | N=104,572                        |
| Patient characteristics     |          | OR [99% CLR]                |                            |                                  |                                  |
| CABG                        | Increase | 1.34 [1.24]                 | 1.36 [1.25]                | 1.37 [1.25]                      | 1.36 [1.24]                      |
|                             | Decrease | 0.78 [1.24]                 | 0.77 [1.26]                | 0.78 [1.24]                      | 0.78 [1.24]                      |
| PTCA/stent                  | Increase | 1.25 [1.13]                 | 1.23 [1.13]                | 1.26 [1.13]                      | 1.26 [1.13]                      |
|                             | Decrease | 0.82 [1.12]                 | 0.80 [1.13]                | 0.83 [1.13]                      | 0.83 [1.12]                      |
| Platelet inhibitors         | Increase | 1.00 [1.25]                 | 0.99 [1.27]                | 0.99 [1.26]                      | 1.01 [1.26]                      |
|                             | Decrease | 0.91 [1.26]                 | 0.92 [1.29]                | 0.92 [1.27]                      | 0.92 [1.27]                      |
| Cardiac catheterization     | Increase | 1.09 [1.19]                 | 1.09 [1.20]                | 1.08 [1.20]                      | 1.08 [1.20]                      |
|                             | Decrease | 1.03 [1.19]                 | 1.03 [1.21]                | 1.03 [1.19]                      | 1.03 [1.19]                      |
| Angiocardiology             | Increase | 1.05 [1.19]                 | 1.04 [1.20]                | 1.03 [1.20]                      | 1.06 [1.19]                      |
|                             | Decrease | 0.90 [1.18]                 | 0.90 [1.20]                | 0.90 [1.19]                      | 0.90 [1.19]                      |
| Cardiogenic shock           | Increase | 1.14 [1.36]                 | 1.14 [1.39]                | 1.18 [1.40]                      | 1.16 [1.38]                      |
|                             | Decrease | 1.04 [1.35]                 | 1.00 [1.40]                | 1.03 [1.39]                      | 1.07 [1.36]                      |
| Cardiac dysrhythmias        | Increase | 0.93 [1.11]                 | 0.93 [1.11]                | 0.93 [1.12]                      | 0.93 [1.11]                      |
|                             | Decrease | 1.00 [1.10]                 | 1.01 [1.11]                | 1.00 [1.10]                      | 1.00 [1.10]                      |
| Hypotension                 | Increase | 1.05 [1.24]                 | 1.07 [1.25]                | 1.04 [1.25]                      | 1.04 [1.25]                      |
|                             | Decrease | 1.01 [1.22]                 | 1.03 [1.24]                | 0.99 [1.23]                      | 0.98 [1.23]                      |
| Acute renal failure         | Increase | 1.00 [1.15]                 | 0.99 [1.16]                | 0.98 [1.16]                      | 1.00 [1.16]                      |
|                             | Decrease | 1.05 [1.13]                 | 1.07 [1.14]                | 1.05 [1.14]                      | 1.05 [1.13]                      |
| Heart failure               | Increase | 1.00 [1.11]                 | 1.00 [1.11]                | 1.02 [1.12]                      | 1.01 [1.11]                      |
|                             | Decrease | 1.02 [1.10]                 | 1.03 [1.11]                | 1.03 [1.11]                      | 1.02 [1.10]                      |
| Length of stay (days)       |          |                             |                            |                                  |                                  |
| 1-3                         |          | 1.                          | 1.                         | 1.                               | 1.                               |
| 4-6                         | Increase | 1.00 [1.12]                 | 0.99 [1.13]                | 1.00 [1.13]                      | 1.02 [1.13]                      |
|                             | Decrease | 1.05 [1.11]                 | 1.06 [1.12]                | 1.05 [1.12]                      | 1.06 [1.12]                      |
| 7-11                        | Increase | 1.02 [1.16]                 | 1.00 [1.17]                | 1.01 [1.17]                      | 1.02 [1.17]                      |
|                             | Decrease | 1.14 [1.14]                 | 1.15 [1.15]                | 1.15 [1.15]                      | 1.16 [1.14]                      |
| 12+                         | Increase | 1.08 [1.23]                 | 1.09 [1.24]                | 1.06 [1.25]                      | 1.07 [1.24]                      |
|                             | Decrease | 1.27 [1.20]                 | 1.31 [1.22]                | 1.32 [1.22]                      | 1.28 [1.21]                      |
| Intensive care              |          |                             |                            |                                  |                                  |
| None                        |          | 1.                          | 1.                         | 1.                               | 1.                               |
| Coronary care unit<br>only  | Increase | 1.03 [1.15]                 | 1.03 [1.16]                | 1.04 [1.16]                      | 1.05 [1.15]                      |
|                             | Decrease | 1.03 [1.13]                 | 1.03 [1.15]                | 1.03 [1.14]                      | 1.02 [1.14]                      |
| Intensive care unit<br>only | Increase | 1.01 [1.13]                 | 1.01 [1.14]                | 1.00 [1.14]                      | 1.01 [1.14]                      |
|                             | Decrease | 1.05 [1.12]                 | 1.06 [1.13]                | 1.05 [1.12]                      | 1.05 [1.12]                      |
| Both                        | Increase | 1.03 [1.20]                 | 1.04 [1.21]                | 1.05 [1.21]                      | 1.03 [1.21]                      |
|                             | Decrease | 1.04 [1.18]                 | 1.03 [1.20]                | 1.05 [1.20]                      | 1.05 [1.19]                      |
| Cardiologist consult        | Increase | 1.04 [1.16]                 | 1.03 [1.17]                | 1.01 [1.17]                      | 1.05 [1.17]                      |
|                             | Decrease | 0.95 [1.14]                 | 0.93 [1.15]                | 0.94 [1.15]                      | 0.95 [1.14]                      |



|                                 |          | Fully<br>adjusted<br>model* | Prevalent<br>statin users† | Post-AMI<br>6-month<br>survival‡ | No AMI 6-<br>month post-<br>AMI§ |
|---------------------------------|----------|-----------------------------|----------------------------|----------------------------------|----------------------------------|
|                                 |          | N=113,296                   | N=101,905                  | N=101,015                        | N=104,572                        |
| Patient characteristics         |          | OR [99% CLR]                |                            |                                  |                                  |
| 30-day follow-up                |          |                             |                            |                                  |                                  |
| None                            |          | 1.                          | 1.                         | 1.                               | 1.                               |
| Primary care provider<br>only‡‡ | Increase | 1.08 [1.16]                 | 1.05 [1.17]                | 1.11 [1.18]                      | 1.07 [1.17]                      |
|                                 | Decrease | 0.97 [1.14]                 | 0.98 [1.16]                | 0.95 [1.16]                      | 0.97 [1.15]                      |
| Cardiologist only               | Increase | 1.15 [1.18]                 | 1.14 [1.19]                | 1.19 [1.19]                      | 1.16 [1.19]                      |
|                                 | Decrease | 0.91 [1.17]                 | 0.91 [1.19]                | 0.92 [1.18]                      | 0.91 [1.17]                      |
| Both                            | Increase | 1.21 [1.16]                 | 1.21 [1.17]                | 1.25 [1.17]                      | 1.21 [1.17]                      |
|                                 | Decrease | 0.95 [1.14]                 | 0.96 [1.16]                | 0.95 [1.15]                      | 0.95 [1.15]                      |

All four models are using the three-level multinomial logistic regression comparing decrease in adherence to no change and comparing increase in adherence to no change. No point estimates fell outside of the 99% confidence interval for the original full model (Model 1 from Table 2 in the main manuscript). \*Fully adjusted model (Model 1 from Table 2 in the main manuscript). †Patients who were first identified as statin users in our data within the 6 months prior to index AMI were excluded (i.e. only prevalent statin users were included). ‡Patients must have survived 6 months post-AMI discharge to be included in model. §Patients with another AMI within 6 months after their index AMI hospital discharge were excluded from model. ¶Odds ratio for a 10% higher pre-AMI adherence (e.g. 50% compared to 40%). #CCI score does not include counts for AMI and dementia. \*\*CCI definition. ††Medicare Chronic Condition Data Warehouse definition. ‡‡Primary care physician, physician assistant, or nurse practitioner. *Abbreviations:* AMI=acute myocardial infarction; PDC=proportion of days covered; OR=odds ratio; CLR=confidence limit ratio (upper 99% confidence limit divided by the lower limit); CCI=Charlson Comorbidity Index; CABG=Coronary artery bypass surgery; PTCA=percutaneous transluminal coronary angioplasty; ACE=angiotensin-converting enzyme; ARB=angiotensin II receptor blocker.

**Table S8.** Three-level multinomial regression models predicting change from **1-year** pre-AMI statin adherence to **1-year** post-AMI statin adherence (N=112,780).

| Patient Characteristics | 3-Level Multinomial Logistic Regression† |                    |
|-------------------------|------------------------------------------|--------------------|
|                         | Decrease                                 | Increase           |
| Pre-AMI PDC (10%)§      | 1.00 (0.99, 1.01)*                       | 0.61 (0.61, 0.62)* |
| Age                     |                                          |                    |
| 66-75                   | 1.                                       | 1.                 |
| 76-85                   | 0.99 (0.94, 1.03)                        | 0.98 (0.93, 1.04)  |
| 86+                     | 0.98 (0.92, 1.04)                        | 0.89 (0.82, 0.97)  |
| Female                  | 1.03 (0.98, 1.07)                        | 1.05 (1.00, 1.11)  |
| Race/ethnicity          |                                          |                    |
| White                   | 1.                                       | 1.                 |
| Black                   | 1.17 (1.09, 1.26)                        | 1.05 (0.96, 1.15)  |
| Hispanic                | 1.26 (1.12, 1.42)                        | 1.27 (1.11, 1.46)  |
| Asian                   | 0.97 (0.84, 1.12)                        | 1.09 (0.92, 1.29)  |
| Other                   | 1.19 (1.04, 1.38)                        | 1.15 (0.97, 1.37)  |
| Dual eligibility        | 0.77 (0.73, 0.81)                        | 1.18 (1.11, 1.26)  |
| Household income#       |                                          |                    |
| ≤\$30,000               | 1.                                       | 1.                 |
| \$30,001-60,000         | 0.96 (0.92, 1.00)                        | 0.99 (0.94, 1.05)  |
| \$60,001-100,000        | 0.95 (0.89, 1.02)                        | 1.05 (0.96, 1.15)  |
| \$100,001-150,000       | 0.98 (0.84, 1.14)                        | 1.10 (0.90, 1.33)  |
| >\$150,000              | 0.91 (0.69, 1.19)                        | 1.07 (0.76, 1.51)  |
| Adjusted CCI**          |                                          |                    |
| 0                       | 1.                                       | 1.                 |
| 1-2                     | 1.07 (1.01, 1.13)                        | 0.92 (0.86, 0.98)  |
| 3-5                     | 1.13 (1.06, 1.20)                        | 0.87 (0.80, 0.94)  |
| 6-8                     | 1.18 (1.08, 1.29)                        | 0.86 (0.77, 0.97)  |
| 9 or more               | 1.56 (1.35, 1.80)                        | 0.87 (0.71, 1.07)  |
| Baseline comorbidities  |                                          |                    |
| Prior AMI††             | 1.03 (0.94, 1.14)                        | 1.00 (0.87, 1.14)  |
| Dementia/Alz‡‡          | 1.18 (1.11, 1.26)                        | 1.16 (1.06, 1.26)* |
| Depression              | 1.10 (1.05, 1.17)                        | 1.03 (0.96, 1.10)  |
| CABG                    | 0.95 (0.78, 1.16)                        | 1.28 (0.99, 1.64)  |
| PTCA/stent              | 1.16 (1.07, 1.26)                        | 0.84 (0.75, 0.95)  |
| Ischemic heart disease  | 1.10 (1.05, 1.16)                        | 0.81 (0.76, 0.86)  |
| Unstable angina         | 1.05 (0.96, 1.15)                        | 0.90 (0.79, 1.02)  |
| Lipid abnormalities     | 0.98 (0.92, 1.05)                        | 1.09 (1.00, 1.19)  |
| Rhabdo/myopathy         | 1.09 (1.01, 1.17)                        | 1.00 (0.90, 1.10)  |

| <u>3-Level Multinomial Logistic Regression†</u> |                   |                   |
|-------------------------------------------------|-------------------|-------------------|
|                                                 | OR (99% CI)       |                   |
| Patient Characteristics                         | Decrease          | Increase          |
| Concurrent medications                          |                   |                   |
| Beta-blocker                                    | 0.89 (0.86, 0.93) | 0.98 (0.93, 1.04) |
| ACE inhibitor/ARB                               | 0.97 (0.93, 1.01) | 1.08 (1.02, 1.14) |
| Index admission                                 |                   |                   |
| Subend infarction§§                             | 0.98 (0.93, 1.03) | 0.89 (0.83, 0.95) |
| CABG                                            | 0.75 (0.68, 0.82) | 1.37 (1.22, 1.53) |
| PTCA/stent                                      | 0.87 (0.82, 0.91) | 1.24 (1.16, 1.32) |
| Platelet inhibitors                             | 0.97 (0.88, 1.08) | 0.90 (0.80, 1.02) |
| Cardiac catheterization                         | 1.05 (0.98, 1.14) | 1.03 (0.94, 1.13) |
| Angiocardiology                                 | 0.87 (0.80, 0.94) | 1.09 (0.99, 1.19) |
| Cardiogenic shock                               | 0.99 (0.86, 1.13) | 1.10 (0.93, 1.29) |
| Cardiac dysrhythmias                            | 1.03 (0.99, 1.08) | 0.98 (0.93, 1.04) |
| Hypotension                                     | 0.99 (0.91, 1.08) | 1.00 (0.89, 1.12) |
| Acute renal failure                             | 1.09 (1.03, 1.15) | 1.02 (0.95, 1.10) |
| Heart failure                                   | 1.01 (0.97, 1.06) | 1.02 (0.96, 1.07) |
| Length of stay (days)                           |                   |                   |
| 1-3                                             | 1.                | 1.                |
| 4-6                                             | 1.04 (0.99, 1.09) | 1.02 (0.96, 1.08) |
| 7-11                                            | 1.10 (1.03, 1.16) | 1.06 (0.98, 1.14) |
| 12+                                             | 1.19 (1.09, 1.29) | 1.14 (1.02, 1.27) |
| Intensive care                                  |                   |                   |
| None                                            | 1.                | 1.                |
| CCU only                                        | 1.03 (0.97, 1.09) | 1.03 (0.96, 1.11) |
| ICU only                                        | 1.06 (1.00, 1.11) | 1.03 (0.96, 1.10) |
| Both                                            | 1.04 (0.97, 1.13) | 1.05 (0.96, 1.16) |
| Cardiologist consult                            | 0.95 (0.90, 1.01) | 1.00 (0.93, 1.08) |
| 30-day follow-up                                |                   |                   |
| None                                            | 1.                | 1.                |
| PCP only                                        | 0.98 (0.92, 1.04) | 1.12 (1.03, 1.21) |
| Cardiologist only                               | 0.90 (0.84, 0.97) | 1.16 (1.06, 1.27) |
| Both                                            | 0.94 (0.88, 0.99) | 1.27 (1.17, 1.37) |

\*Point estimate does not fall within the 99% confidence interval for the original full model (Model 1 from Table 2 in the main manuscript). †Three-level multinomial logistic regression comparing decrease in adherence to no change and comparing increase in adherence to no change. §Odds ratio for a 10% higher pre-AMI adherence (e.g. 50% compared to 40%). ¶Enrolled in Medicare and Medicaid. #Median household income of US Census block groups for individuals aged 65 and older. \*\*CCI score does not include counts for AMI and dementia. ††CCI definition. ‡‡Medicare Chronic Condition Data Warehouse definition. §§Diagnosis code for subendocardial infarction, compared to a transmural infarction. ||Primary care physician, physician assistant, or nurse practitioner. *Abbreviations:* AMI=acute myocardial infarction; OR=odds ratio; CI=confidence interval; PDC=proportion of days covered; CCI=Charlson Comorbidity Index; Alz=Alzheimer's disease; CABG=Coronary artery bypass surgery; PTCA=percutaneous transluminal coronary angioplasty; Rhabdo=rhabdomyolysis; ACE=angiotensin-converting enzyme; ARB=angiotensin II receptor blocker; subend=subendocardial; CCU=coronary care unit; ICU=intensive care unit; PCP=primary care provider.

**Table S9.** Three-level multinomial regression model predicting statin adherence change after an AMI using a likelihood function conditional on the pre-AMI adherence category.†

| Patient Characteristics     | 3-Level Multinomial Logistic Regression‡ |                    |
|-----------------------------|------------------------------------------|--------------------|
|                             | Decrease                                 | Increase           |
| OR (99% CI)                 |                                          |                    |
| Age                         |                                          |                    |
| 66-75                       | 1.                                       | 1.                 |
| 76-85                       | 0.98 (0.93, 1.02)                        | 1.00 (0.95, 1.06)  |
| 86+                         | 0.97 (0.90, 1.03)                        | 0.97 (0.89, 1.06)* |
| Female                      | 1.04 (0.99, 1.08)                        | 1.02 (0.97, 1.08)  |
| Race/ethnicity              |                                          |                    |
| White                       | 1.                                       | 1.                 |
| Black                       | 1.29 (1.19, 1.40)                        | 0.94 (0.86, 1.02)* |
| Hispanic                    | 1.36 (1.19, 1.55)                        | 1.09 (0.94, 1.25)* |
| Asian                       | 0.98 (0.84, 1.15)                        | 1.16 (0.96, 1.40)  |
| Other                       | 1.24 (1.06, 1.44)                        | 1.02 (0.85, 1.23)  |
| Dual eligibility§           | 0.77 (0.73, 0.82)                        | 1.31 (1.23, 1.40)* |
| Household income            |                                          |                    |
| ≤\$30,000                   | 1.                                       | 1.                 |
| \$30,001-60,000             | 0.95 (0.91, 1.00)                        | 0.98 (0.93, 1.04)  |
| \$60,001-100,000            | 0.95 (0.88, 1.03)                        | 1.03 (0.94, 1.13)  |
| \$100,001-150,000           | 0.99 (0.84, 1.17)                        | 1.05 (0.86, 1.30)  |
| >\$150,000                  | 0.77 (0.56, 1.05)                        | 1.06 (0.74, 1.52)  |
| Adjusted CCI#               |                                          |                    |
| 0                           | 1.                                       | 1.                 |
| 1-2                         | 1.04 (0.98, 1.11)                        | 0.86 (0.80, 0.93)  |
| 3-5                         | 1.10 (1.03, 1.18)                        | 0.83 (0.76, 0.90)  |
| 6-8                         | 1.17 (1.06, 1.29)                        | 0.79 (0.70, 0.89)  |
| 9 or more                   | 1.47 (1.26, 1.72)                        | 0.72 (0.59, 0.88)  |
| Baseline comorbidities      |                                          |                    |
| Prior AMI**                 | 1.14 (1.06, 1.22)                        | 1.01 (0.93, 1.10)  |
| Dementia/Alzheimer's††      | 1.07 (0.97, 1.19)                        | 0.95 (0.83, 1.08)  |
| Depression                  | 1.12 (1.05, 1.19)                        | 0.99 (0.92, 1.06)  |
| CABG                        | 1.11 (0.90, 1.37)                        | 1.28 (0.98, 1.67)  |
| PTCA/stent                  | 1.14 (1.04, 1.26)                        | 0.82 (0.73, 0.92)  |
| Ischemic heart disease      | 1.11 (1.06, 1.17)                        | 0.77 (0.73, 0.82)* |
| Unstable angina             | 1.05 (0.96, 1.16)                        | 0.88 (0.78, 0.99)  |
| Lipid abnormalities         | 0.97 (0.90, 1.05)                        | 1.00 (0.92, 1.09)  |
| Rhabdomyolysis/myopathy     | 1.18 (1.08, 1.28)                        | 0.98 (0.89, 1.09)  |
| Concurrent medications      |                                          |                    |
| Beta-blocker                | 0.85 (0.81, 0.89)                        | 0.99 (0.94, 1.05)  |
| ACE inhibitor/ARB           | 0.92 (0.88, 0.96)                        | 1.07 (1.02, 1.13)  |
| Index admission             |                                          |                    |
| Subendocardial infarction‡‡ | 0.97 (0.92, 1.03)                        | 0.91 (0.85, 0.97)  |
| CABG                        | 0.77 (0.69, 0.86)                        | 1.50 (1.32, 1.69)* |
| PTCA/stent                  | 0.82 (0.77, 0.86)                        | 1.33 (1.25, 1.42)* |

| Patient Characteristics                  | 3-Level Multinomial Logistic Regression <sup>‡</sup> |                    |
|------------------------------------------|------------------------------------------------------|--------------------|
|                                          | Decrease                                             | Increase           |
| Platelet inhibitors                      | 0.91 (0.81, 1.02)                                    | 0.99 (0.87, 1.12)  |
| Cardiac catheterization                  | 1.04 (0.95, 1.13)                                    | 1.10 (0.99, 1.21)  |
| Angiocardiology                          | 0.89 (0.81, 0.96)                                    | 1.05 (0.96, 1.16)  |
| Cardiogenic shock                        | 1.03 (0.89, 1.20)                                    | 1.10 (0.92, 1.32)  |
| Cardiac dysrhythmias                     | 1.00 (0.96, 1.05)                                    | 0.95 (0.90, 1.01)  |
| Hypotension                              | 1.00 (0.91, 1.11)                                    | 1.04 (0.92, 1.17)  |
| Acute renal failure                      | 1.05 (0.99, 1.12)                                    | 0.99 (0.92, 1.07)  |
| Heart failure                            | 1.02 (0.98, 1.07)                                    | 1.02 (0.96, 1.08)  |
| Length of stay (days)                    |                                                      |                    |
| 1-3                                      | 1.                                                   | 1.                 |
| 4-6                                      | 1.06 (1.00, 1.11)                                    | 1.01 (0.95, 1.07)  |
| 7-11                                     | 1.14 (1.07, 1.22)                                    | 1.04 (0.96, 1.13)  |
| 12+                                      | 1.27 (1.16, 1.39)                                    | 1.06 (0.95, 1.19)  |
| Intensive care                           |                                                      |                    |
| None                                     | 1.                                                   | 1.                 |
| Coronary care unit only                  | 1.03 (0.97, 1.10)                                    | 1.04 (0.97, 1.13)  |
| Intensive care unit only                 | 1.06 (1.00, 1.12)                                    | 1.02 (0.96, 1.09)  |
| Both                                     | 1.05 (0.96, 1.14)                                    | 1.00 (0.91, 1.11)  |
| Cardiologist consult                     | 0.95 (0.89, 1.01)                                    | 1.04 (0.96, 1.13)  |
| 30-day follow-up                         |                                                      |                    |
| None                                     | 1.                                                   | 1.                 |
| Primary care provider only <sup>§§</sup> | 0.95 (0.89, 1.02)                                    | 1.12 (1.04, 1.21)  |
| Cardiologist only                        | 0.88 (0.82, 0.96)                                    | 1.22 (1.11, 1.33)  |
| Both                                     | 0.92 (0.86, 0.98)                                    | 1.32 (1.22, 1.43)* |

\*Point estimate does not fall within the 99% confidence interval for the original full model (Model 1 from Table 2 in the main manuscript). <sup>†</sup>Using PROC NLMIXED in SAS, the likelihood function was defined as conditional on the pre-AMI adherence category. Patients who were moderately non-adherent (pre-AMI PDC 40-79.9%) were compared to the whole population on the likelihood of having no change, decreased, or increased adherence. Patients who were severely non-adherent (pre-AMI PDC <40%) were compared to patients who were severely non-adherent or moderately non-adherent on the likelihood of having no change or increased adherence. Patients who were adherent (pre-AMI PDC ≥80%) were compared to patients who were adherent or moderately non-adherent on the likelihood of having no change or decreased adherence. <sup>‡</sup>Three-level multinomial logistic regression comparing decrease in adherence to no change and comparing increase in adherence to no change. <sup>§</sup>Enrolled in Medicare and Medicaid. <sup>¶</sup>Median household income of US Census block groups for individuals aged 65 and older. <sup>#</sup>CCI score does not include counts for AMI and dementia. <sup>\*\*</sup>CCI definition. <sup>††</sup>Medicare Chronic Condition Data Warehouse definition. <sup>‡‡</sup>Diagnosis code for subendocardial infarction, compared to a transmural infarction. <sup>§§</sup>Primary care physician, physician assistant, or nurse practitioner. *Abbreviations:* AMI=acute myocardial infarction; OR=odds ratio; CI=confidence interval; PDC=proportion of days covered; CCI=Charlson Comorbidity Index; CABG=Coronary artery bypass surgery; PTCA=percutaneous transluminal coronary angioplasty; ACE=angiotensin-converting enzyme; ARB=angiotensin II receptor blocker.

**Table S10.** Linear regression model predicting statin adherence change after an AMI.

| Patient Characteristics | Mean Change in PDC (99% CI)* |
|-------------------------|------------------------------|
| Intercept†              | -2.93 (-4.16, -1.70)         |
| Pre-AMI PDC‡            | -0.50 (-0.51, -0.50)         |
| Age                     |                              |
| 66-75                   | 0.                           |
| 76-85                   | 0.13 (-0.33, 0.59)           |
| 86+                     | -0.05 (-0.71, 0.61)          |
| Female                  | -0.04 (-0.47, 0.40)          |
| Race/ethnicity          |                              |
| White                   | 0.                           |
| Black                   | -1.36 (-2.13, -0.59)         |
| Hispanic                | -0.38 (-1.63, 0.87)          |
| Asian                   | 0.92 (-0.53, 2.37)           |
| Other                   | -0.64 (-2.15, 0.87)          |
| Dual eligibility§       | 3.65 (3.12, 4.18)            |
| Household income        |                              |
| ≤\$30,000               | 0.                           |
| \$30,001-60,000         | 0.31 (-0.14, 0.76)           |
| \$60,001-100,000        | 0.71 (-0.04, 1.46)           |
| \$100,001-150,000       | 0.65 (-0.95, 2.25)           |
| >\$150,000              | 2.20 (-0.61, 5.01)           |
| Adjusted CCI#           |                              |
| 0                       | 0.                           |
| 1-2                     | -1.20 (-1.78, -0.62)         |
| 3-5                     | -2.03 (-2.68, -1.38)         |
| 6-8                     | -2.68 (-3.63, -1.74)         |
| 9 or more               | -5.49 (-7.12, -3.86)         |
| Baseline comorbidities  |                              |
| Prior AMI**             | -0.88 (-1.93, 0.17)          |
| Dementia/Alzheimer's††  | -1.37 (-2.08, -0.66)         |
| Depression              | -0.69 (-1.29, -0.10)         |
| CABG                    | 0.59 (-1.52, 2.69)           |
| PTCA/stent              | -2.50 (-3.42, -1.57)         |
| Ischemic heart disease  | -2.67 (-3.15, -2.18)         |
| Unstable angina         | -1.04 (-2.02, -0.05)         |
| Lipid abnormalities     | 0.29 (-0.41, 0.98)           |
| Rhabdo/myopathy         | -1.34 (-2.18, -0.50)         |
| Concurrent medications  |                              |
| Beta-blocker            | 0.70 (0.24, 1.16)            |
| ACE inhibitor/ARB       | 0.77 (0.32, 1.21)            |

| Patient Characteristics      | Mean Change in PDC (99% CI)* |
|------------------------------|------------------------------|
| Index admission              |                              |
| Subendocardial infarction‡‡  | -0.61 (-1.15, -0.07)         |
| CABG                         | 5.02 (4.04, 6.00)            |
| PTCA/stent                   | 3.65 (3.12, 4.19)            |
| Platelet inhibitors          | 0.79 (-0.24, 1.81)           |
| Cardiac catheterization      | 0.49 (-0.31, 1.28)           |
| Angiocardiology              | 1.31 (0.53, 2.09)            |
| Cardiogenic shock            | 0.89 (-0.56, 2.33)           |
| Cardiac dysrhythmias         | -0.39 (-0.84, 0.06)          |
| Hypotension                  | -0.01 (-0.96, 0.94)          |
| Acute renal failure          | -0.34 (-0.95, 0.26)          |
| Heart failure                | -0.10 (-0.55, 0.35)          |
| Length of stay (days)        |                              |
| 1-3                          | 0.                           |
| 4-6                          | -0.39 (-0.89, 0.11)          |
| 7-11                         | -1.17 (-1.81, -0.54)         |
| 12+                          | -1.96 (-2.87, -1.06)         |
| Intensive care               |                              |
| None                         | 0.                           |
| Coronary care unit only      | 0.18 (-0.42, 0.79)           |
| Intensive care unit only     | -0.23 (-0.76, 0.31)          |
| Both                         | 0.06 (-0.74, 0.87)           |
| Cardiologist consult         | 0.92 (0.29, 1.56)            |
| 30-day follow-up             |                              |
| None                         | 0.                           |
| Primary care provider only§§ | 0.92 (0.26, 1.58)            |
| Cardiologist only            | 2.37 (1.63, 3.11)            |
| Both                         | 2.44 (1.79, 3.08)            |

\*Linear regression model predicting adherence change as a continuous outcome (post-AMI PDC minus pre-AMI PDC). Estimates can be interpreted as follows: an estimate of 2.44 means that the patient characteristic is associated with a 2.44% increase in PDC (e.g. 70.00% to 72.44%) compared to the reference category after an AMI, holding all other patient characteristics constant; an estimate of -1.96 means the patient characteristic is associated with a 1.96% decrease in PDC compared to the reference category after an AMI. †Predicted change in adherence for patients with a pre-AMI PDC of 80% and all other variables set to the reference category. ‡‡Predicted change in statin adherence associated with a 1% increase in pre-AMI PDC (e.g. a patient with a pre-AMI PDC of 75% would be predicted to have a 0.50% decrease in statin PDC after an AMI compared to a patient with 74% PDC pre-AMI). §Enrolled in Medicare and Medicaid. ¶Median household income of US Census block groups for individuals aged 65 and older. #CCI score does not include counts for AMI and dementia. \*\*CCI definition. ††Medicare Chronic Condition Data Warehouse definition. ‡‡Diagnosis code for subendocardial infarction, compared to a transmural infarction. §§Primary care physician, physician assistant, or nurse practitioner. *Abbreviations:* AMI=acute myocardial infarction; PDC=proportion of days covered; CI=confidence interval; CCI=Charlson Comorbidity Index; CABG=Coronary artery bypass surgery; PTCA=percutaneous transluminal coronary angioplasty; ACE=angiotensin-converting enzyme; ARB=angiotensin II receptor blocker.

**Figure S1.** Sensitivity analysis showing distribution of **1-year** post-AMI adherence stratified by **1-year** pre-AMI adherence

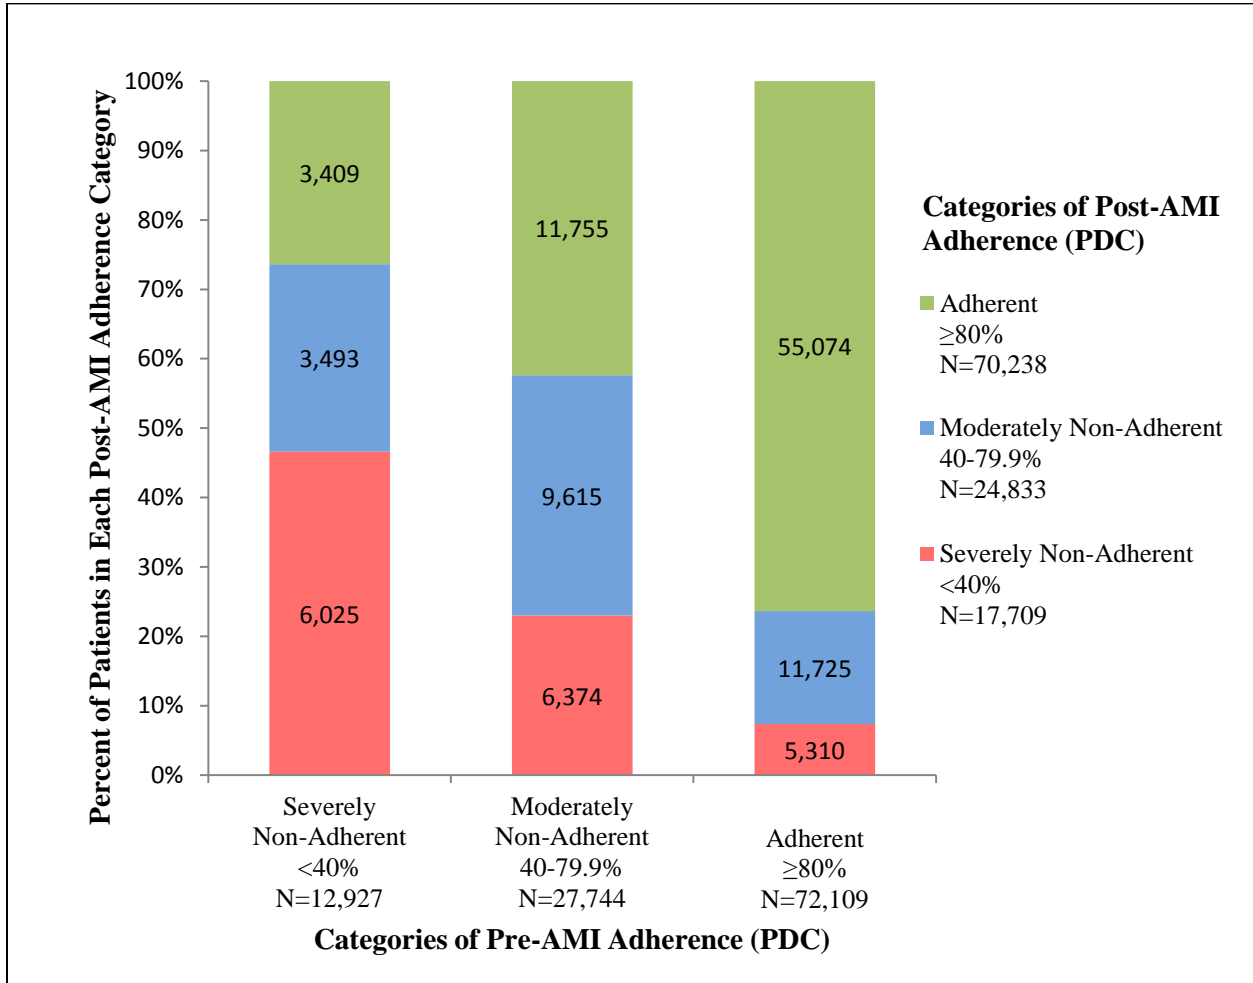

AMI=acute myocardial infarction; PDC=proportion of days covered.
